# Supplementary material
Source: publisher figshare collection journal article supplement (https://acs.figshare.com/ndownloader/files/5065228)
Supplement: Supplementary file 1 [file 5065228]

data_General

_publ_contact_author_name             'Kohtaro Osakada'
_publ_contact_author_email            'kosakada@res.titech.ac.jp'
_publ_contact_author_fax              '+81-45-924-5224'
_publ_contact_author_phone            '+81-45-924-5224'
_publ_requested_journal               'Organometallics'

loop_
_publ_author_name
'Ivayla Pantcheva and Kohtaro Osakada '

_publ_author_address
;
Chemical Resources Laboratory, Tokyo Institute of Technology, 
4259 Nagatsuta, Midori-ku,
Yokohama 226-8503 JAPAN'
;

_publ_section_title
;
Synthesis an Reactivity of Platinum(II) Complex 
with Dehydro(arylboronic anhydride) Ligand.
Transmetalation of Arylboronic Acid Promoted by Pt(II) Complex
;

data_form1

# CHEMICAL DATA

_chemical_formula_sum                  'C57 H51 B3 O4.50 P3 Pt1.50 '
_chemical_formula_moiety               'C57 H51 B3 O4.50 P3 Pt1.50 '
_chemical_formula_weight               1226.01
_chemical_melting_point                ?

#==============================================================================

# CRYSTAL DATA
_symmetry_cell_setting                 monoclinic
_symmetry_space_group_name_H-M        'C 1 2/c 1'
_symmetry_space_group_name_Hall       '-C 2yc'
_symmetry_Int_Tables_number            15
loop_
_symmetry_equiv_pos_site_id
_symmetry_equiv_pos_as_xyz
1   '+X,+Y,+Z'
2   '-X,+Y,1/2-Z'
3   '-X,-Y,-Z'
4   '+X,-Y,1/2+Z'
5   '1/2+X,1/2+Y,+Z'
6   '1/2-X,1/2+Y,1/2-Z'
7   '1/2-X,1/2-Y,-Z'
8   '1/2+X,1/2-Y,1/2+Z'

#------------------------------------------------------------------------------

_cell_length_a                         30.007(4)
_cell_length_b                         15.3558(11)
_cell_length_c                         26.908(6)
_cell_angle_alpha                      90.0000
_cell_angle_beta                       123.706(6)
_cell_angle_gamma                      90.0000
_cell_volume                           10314(3)
_cell_formula_units_Z                  8
_cell_measurement_reflns_used          16270
_cell_measurement_theta_min            3.0
_cell_measurement_theta_max            27.5
_cell_measurement_temperature          113.1

#------------------------------------------------------------------------------

_exptl_crystal_description            'prism'
_exptl_crystal_colour                 'colorless'
_exptl_crystal_size_max                0.30
_exptl_crystal_size_mid                0.20
_exptl_crystal_size_min                0.05
_exptl_crystal_density_diffrn          1.579
_exptl_crystal_density_meas            ?
_exptl_crystal_density_method         'not measured'
_exptl_crystal_F_000                   4848.00
_exptl_absorpt_coefficient_mu          4.194
_exptl_absorpt_correction_type         none
_exptl_absorpt_correction_T_min        0.000
_exptl_absorpt_correction_T_max        0.000

#==============================================================================

# EXPERIMENTAL DATA

_diffrn_radiation_type                'Mo K\a'
_diffrn_radiation_wavelength           0.71070
_diffrn_measurement_device_type       'Rigaku Saturn'
_diffrn_measurement_method             \w
_diffrn_detector_area_resol_mean       7.31
_diffrn_reflns_number                  36648
_diffrn_reflns_av_R_equivalents        0.030
_diffrn_reflns_theta_max               27.48
_diffrn_measured_fraction_theta_max    0.969
_diffrn_reflns_theta_full              27.48
_diffrn_measured_fraction_theta_full   0.969
_diffrn_reflns_limit_h_min             -32
_diffrn_reflns_limit_h_max             38
_diffrn_reflns_limit_k_min             -19
_diffrn_reflns_limit_k_max             19
_diffrn_reflns_limit_l_min             -34
_diffrn_reflns_limit_l_max             30

#==============================================================================

# REFINEMENT DATA

_refine_special_details
;
    Refinement using reflections with F^2^ > 2.0 sigma(F^2^).
    The weighted R-factor(wR), goodness of fit (S) and R-factor (gt) are 
    based on F, with F set to zero for negative F. The threshold expression of
    F^2^ > 2.0 sigma(F^2^) is used only for calculating R-factor (gt).
;
_reflns_number_total                   11448
_reflns_number_gt                      10092
_reflns_threshold_expression           F^2^>2.0\s(F^2^)
_refine_ls_structure_factor_coef       F
_refine_ls_R_factor_gt                 0.0287
_refine_ls_wR_factor_ref               0.0373
_refine_ls_hydrogen_treatment          refall
_refine_ls_number_reflns               10126
_refine_ls_number_parameters           674
_refine_ls_goodness_of_fit_ref         1.001
_refine_ls_weighting_scheme            calc
_refine_ls_weighting_details
'w = 1/[0.0006Fo^2^ + 1.0000\s(Fo^2^)]'
_refine_ls_shift/su_max                0.0000
_refine_diff_density_max               31.00
_refine_diff_density_min               -6.04
_refine_ls_extinction_method           none
_refine_ls_extinction_coef             ?

loop_
_atom_type_symbol
_atom_type_description
_atom_type_scat_dispersion_real
_atom_type_scat_dispersion_imag
_atom_type_scat_source
  'C' 'C'  0.003 0.002 
;
International Tables for Crystallography
(1992, Vol. C, Tables 4.2.6.8 and 6.1.1.4)
;
  'H' 'H'  0.000 0.000 
;
International Tables for Crystallography
(1992, Vol. C, Table 6.1.1.4)
;
  'O' 'O'  0.011 0.006 
;
International Tables for Crystallography
(1992, Vol. C, Tables 4.2.6.8 and 6.1.1.4)
;
  'B' 'B'  0.001 0.001 
;
International Tables for Crystallography
(1992, Vol. C, Tables 4.2.6.8 and 6.1.1.4)
;
  'P' 'P'  0.102 0.094 
;
International Tables for Crystallography
(1992, Vol. C, Tables 4.2.6.8 and 6.1.1.4)
;
  'Pt' 'Pt'  -1.703 8.390 
;
International Tables for Crystallography
(1992, Vol. C, Tables 4.2.6.8 and 6.1.1.4)
;

#==============================================================================

# ATOMIC COORDINATES AND THERMAL PARAMETERS

loop_
_atom_site_label
_atom_site_type_symbol
_atom_site_fract_x
_atom_site_fract_y
_atom_site_fract_z
_atom_site_U_iso_or_equiv
_atom_site_adp_type
_atom_site_occupancy
_atom_site_symmetry_multiplicity
_atom_site_calc_flag
_atom_site_refinement_flags
_atom_site_disorder_assembly
_atom_site_disorder_group
 Pt(1) Pt 0.2107 0.732730(10) 0.1819 0.02331(3) Uani 1.00 1 d . . .
 Pt(2) Pt 0.0000 0.567180(10) 0.2500 0.02467(4) Uani 1.00 2 d S . .
 P(1) P 0.24944(4) 0.65067(5) 0.14852(4) 0.0256(2) Uani 1.00 1 d . . .
 P(2) P 0.25648(4) 0.65617(6) 0.26551(4) 0.0263(2) Uani 1.00 1 d . . .
 P(3) P -0.02155(3) 0.67358(5) 0.18416(3) 0.02288(18) Uani 1.00 1 d . . .
 O(1) O 0.17034(10) 0.80292(17) 0.10444(10) 0.0321(6) Uani 1.00 1 d . . .
 O(2) O 0.17588(10) 0.80168(17) 0.21614(10) 0.0322(6) Uani 1.00 1 d . . .
 O(3) O 0.12506(9) 0.90070(14) 0.13330(10) 0.0283(5) Uani 1.00 1 d . . .
 O(4) O -0.01096(12) 0.47318(17) 0.19051(11) 0.0393(7) Uani 1.00 1 d . . .
 O(5) O 0.0000 0.3481(2) 0.2500 0.0387(10) Uani 1.00 2 d S . .
 C(1) C 0.11478(13) 0.9261(2) 0.03508(13) 0.0297(8) Uani 1.00 1 d . . .
 C(2) C 0.13182(19) 0.9097(3) -0.00348(18) 0.0541(13) Uani 1.00 1 d . . .
 C(3) C 0.1107(2) 0.9564(3) -0.0561(2) 0.0635(16) Uani 1.00 1 d . . .
 C(4) C 0.07270(18) 1.0198(2) -0.07154(17) 0.0468(11) Uani 1.00 1 d . . .
 C(5) C 0.05460(17) 1.0352(2) -0.03522(17) 0.0432(10) Uani 1.00 1 d . . .
 C(6) C 0.07613(14) 0.9890(2) 0.01781(14) 0.0347(9) Uani 1.00 1 d . . .
 C(7) C 0.11566(12) 0.9088(2) 0.22121(12) 0.0226(7) Uani 1.00 1 d . . .
 C(8) C 0.07621(12) 0.9733(2) 0.19392(13) 0.0278(8) Uani 1.00 1 d . . .
 C(9) C 0.05638(14) 1.0130(2) 0.22437(16) 0.0348(9) Uani 1.00 1 d . . .
 C(10) C 0.07590(14) 0.9896(2) 0.28271(16) 0.0358(9) Uani 1.00 1 d . . .
 C(11) C 0.11464(14) 0.9257(2) 0.31036(16) 0.0332(9) Uani 1.00 1 d . . .
 C(12) C 0.13384(12) 0.8851(2) 0.27960(13) 0.0283(8) Uani 1.00 1 d . . .
 C(13) C 0.28757(16) 0.5642(2) 0.20321(14) 0.0320(9) Uani 1.00 1 d . . .
 C(14) C 0.31052(14) 0.5993(2) 0.26640(14) 0.0316(8) Uani 1.00 1 d . . .
 C(15) C 0.29639(13) 0.7071(2) 0.13759(14) 0.0299(8) Uani 1.00 1 d . . .
 C(16) C 0.35100(16) 0.7017(2) 0.17855(17) 0.0395(10) Uani 1.00 1 d . . .
 C(17) C 0.38574(18) 0.7466(3) 0.1692(2) 0.0506(12) Uani 1.00 1 d . . .
 C(18) C 0.36576(19) 0.7960(3) 0.1186(2) 0.0598(14) Uani 1.00 1 d . . .
 C(19) C 0.3114(2) 0.8026(3) 0.0780(2) 0.0623(15) Uani 1.00 1 d . . .
 C(20) C 0.27653(18) 0.7583(2) 0.08711(19) 0.0455(11) Uani 1.00 1 d . . .
 C(21) C 0.20664(16) 0.5950(2) 0.07787(14) 0.0333(9) Uani 1.00 1 d . . .
 C(22) C 0.2285(2) 0.5333(2) 0.05926(19) 0.0474(12) Uani 1.00 1 d . . .
 C(23) C 0.1963(2) 0.4921(3) 0.0049(2) 0.0649(16) Uani 1.00 1 d . . .
 C(24) C 0.1432(2) 0.5117(3) -0.0312(2) 0.0650(16) Uani 1.00 1 d . . .
 C(25) C 0.1210(2) 0.5719(3) -0.0133(2) 0.0599(14) Uani 1.00 1 d . . .
 C(26) C 0.15330(17) 0.6138(2) 0.04174(18) 0.0446(11) Uani 1.00 1 d . . .
 C(27) C 0.29105(13) 0.7151(2) 0.33587(16) 0.0331(9) Uani 1.00 1 d . . .
 C(28) C 0.32066(19) 0.6699(2) 0.38847(17) 0.0475(11) Uani 1.00 1 d . . .
 C(29) C 0.3518(2) 0.7155(3) 0.44304(19) 0.0608(14) Uani 1.00 1 d . . .
 C(30) C 0.3499(2) 0.8037(3) 0.44375(19) 0.0559(13) Uani 1.00 1 d . . .
 C(31) C 0.3195(2) 0.8485(3) 0.3912(2) 0.0655(14) Uani 1.00 1 d . . .
 C(32) C 0.28981(19) 0.8046(2) 0.33714(18) 0.0497(11) Uani 1.00 1 d . . .
 C(33) C 0.21627(14) 0.5723(2) 0.26995(16) 0.0330(9) Uani 1.00 1 d . . .
 C(34) C 0.16148(16) 0.5855(2) 0.23985(17) 0.0362(9) Uani 1.00 1 d . . .
 C(35) C 0.12905(18) 0.5228(2) 0.2417(2) 0.0454(11) Uani 1.00 1 d . . .
 C(36) C 0.1511(2) 0.4477(3) 0.2739(2) 0.0600(15) Uani 1.00 1 d . . .
 C(37) C 0.2057(2) 0.4341(3) 0.3044(2) 0.0690(17) Uani 1.00 1 d . . .
 C(38) C 0.23837(19) 0.4955(2) 0.3019(2) 0.0526(13) Uani 1.00 1 d . . .
 C(39) C 0.01206(16) 0.3307(2) 0.16416(17) 0.0392(10) Uani 1.00 1 d . . .
 C(40) C 0.0359(2) 0.3665(3) 0.1365(2) 0.0629(16) Uani 1.00 1 d . . .
 C(41) C 0.0495(2) 0.3159(4) 0.1040(2) 0.078(2) Uani 1.00 1 d . . .
 C(42) C 0.0370(2) 0.2291(3) 0.0947(2) 0.0703(18) Uani 1.00 1 d . . .
 C(43) C 0.0135(2) 0.1926(3) 0.1205(2) 0.0761(19) Uani 1.00 1 d . . .
 C(44) C 0.0012(2) 0.2419(2) 0.1549(2) 0.0573(15) Uani 1.00 1 d . . .
 C(45) C 0.00430(13) 0.7765(2) 0.22419(13) 0.0268(7) Uani 1.00 1 d . . .
 C(46) C -0.09363(12) 0.6919(2) 0.13862(12) 0.0269(7) Uani 1.00 1 d . . .
 C(47) C -0.11564(16) 0.7550(2) 0.09372(16) 0.0366(9) Uani 1.00 1 d . . .
 C(48) C -0.16940(17) 0.7763(3) 0.06448(18) 0.0488(11) Uani 1.00 1 d . . .
 C(49) C -0.20115(17) 0.7352(3) 0.07952(18) 0.0520(12) Uani 1.00 1 d . . .
 C(50) C -0.18053(17) 0.6713(3) 0.12194(18) 0.0575(14) Uani 1.00 1 d . . .
 C(51) C -0.12633(16) 0.6500(3) 0.15219(16) 0.0444(11) Uani 1.00 1 d . . .
 C(52) C -0.00149(12) 0.6681(2) 0.13202(13) 0.0284(8) Uani 1.00 1 d . . .
 C(53) C 0.0209(2) 0.7383(3) 0.1215(2) 0.0710(18) Uani 1.00 1 d . . .
 C(54) C 0.0344(2) 0.7311(4) 0.0795(2) 0.084(2) Uani 1.00 1 d . . .
 C(55) C 0.0271(2) 0.6544(4) 0.0504(2) 0.0642(16) Uani 1.00 1 d . . .
 C(56) C 0.0031(3) 0.5874(4) 0.0588(2) 0.091(2) Uani 1.00 1 d . . .
 C(57) C -0.0098(2) 0.5925(3) 0.1009(2) 0.0693(18) Uani 1.00 1 d . . .
 B(1) B 0.13952(14) 0.8708(2) 0.09504(16) 0.0264(8) Uani 1.00 1 d . . .
 B(2) B 0.14069(14) 0.8653(2) 0.18838(16) 0.0244(8) Uani 1.00 1 d . . .
 B(3) B -0.00077(16) 0.3897(2) 0.20359(19) 0.0347(10) Uani 1.00 1 d . . .
 H(1) H 0.1572 0.8647 0.0063 0.069 Uiso 1.00 1 c R . .
 H(2) H 0.1233 0.9454 -0.0811 0.082 Uiso 1.00 1 c R . .
 H(3) H 0.0585 1.0520 -0.1075 0.053 Uiso 1.00 1 c R . .
 H(4) H 0.0281 1.0784 -0.0460 0.048 Uiso 1.00 1 c R . .
 H(5) H 0.0633 1.0007 0.0424 0.042 Uiso 1.00 1 c R . .
 H(6) H 0.0630 0.9905 0.1541 0.035 Uiso 1.00 1 c R . .
 H(7) H 0.0292 1.0562 0.2050 0.044 Uiso 1.00 1 c R . .
 H(8) H 0.0626 1.0169 0.3036 0.050 Uiso 1.00 1 c R . .
 H(9) H 0.1283 0.9099 0.3505 0.045 Uiso 1.00 1 c R . .
 H(10) H 0.1599 0.8403 0.2989 0.036 Uiso 1.00 1 c R . .
 H(11) H 0.2645 0.5164 0.1958 0.043 Uiso 1.00 1 c R . .
 H(12) H 0.3160 0.5454 0.1998 0.043 Uiso 1.00 1 c R . .
 H(13) H 0.3390 0.6386 0.2772 0.040 Uiso 1.00 1 c R . .
 H(14) H 0.3235 0.5527 0.2943 0.041 Uiso 1.00 1 c R . .
 H(15) H 0.3648 0.6668 0.2133 0.049 Uiso 1.00 1 c R . .
 H(16) H 0.4233 0.7430 0.1977 0.060 Uiso 1.00 1 c R . .
 H(17) H 0.3894 0.8265 0.1117 0.072 Uiso 1.00 1 c R . .
 H(18) H 0.2976 0.8373 0.0432 0.075 Uiso 1.00 1 c R . .
 H(19) H 0.2389 0.7633 0.0593 0.054 Uiso 1.00 1 c R . .
 H(20) H 0.2656 0.5196 0.0841 0.060 Uiso 1.00 1 c R . .
 H(21) H 0.2115 0.4491 -0.0069 0.083 Uiso 1.00 1 c R . .
 H(22) H 0.1218 0.4839 -0.0689 0.078 Uiso 1.00 1 c R . .
 H(23) H 0.0839 0.5853 -0.0383 0.068 Uiso 1.00 1 c R . .
 H(24) H 0.1379 0.6556 0.0539 0.055 Uiso 1.00 1 c R . .
 H(25) H 0.3216 0.6081 0.3882 0.055 Uiso 1.00 1 c R . .
 H(26) H 0.3721 0.6837 0.4793 0.071 Uiso 1.00 1 c R . .
 H(27) H 0.3706 0.8337 0.4807 0.064 Uiso 1.00 1 c R . .
 H(28) H 0.3185 0.9103 0.3920 0.070 Uiso 1.00 1 c R . .
 H(29) H 0.2695 0.8367 0.3010 0.054 Uiso 1.00 1 c R . .
 H(30) H 0.1460 0.6373 0.2175 0.047 Uiso 1.00 1 c R . .
 H(31) H 0.0915 0.5319 0.2209 0.059 Uiso 1.00 1 c R . .
 H(32) H 0.1289 0.4056 0.2758 0.082 Uiso 1.00 1 c R . .
 H(33) H 0.2207 0.3814 0.3258 0.089 Uiso 1.00 1 c R . .
 H(34) H 0.2760 0.4867 0.3234 0.067 Uiso 1.00 1 c R . .
 H(35) H 0.0436 0.4270 0.1408 0.085 Uiso 1.00 1 c R . .
 H(36) H 0.0675 0.3422 0.0879 0.109 Uiso 1.00 1 c R . .
 H(37) H 0.0436 0.1954 0.0698 0.093 Uiso 1.00 1 c R . .
 H(38) H 0.0060 0.1320 0.1158 0.104 Uiso 1.00 1 c R . .
 H(39) H -0.0147 0.2138 0.1728 0.077 Uiso 1.00 1 c R . .
 H(40) H 0.0122 0.8139 0.2019 0.034 Uiso 1.00 1 c R . .
 H(41) H 0.0359 0.7671 0.2627 0.034 Uiso 1.00 1 c R . .
 H(42) H -0.0940 0.7841 0.0832 0.041 Uiso 1.00 1 c R . .
 H(43) H -0.1846 0.8184 0.0334 0.051 Uiso 1.00 1 c R . .
 H(44) H -0.2376 0.7519 0.0602 0.058 Uiso 1.00 1 c R . .
 H(45) H -0.2032 0.6419 0.1308 0.070 Uiso 1.00 1 c R . .
 H(46) H -0.1119 0.6064 0.1823 0.054 Uiso 1.00 1 c R . .
 H(47) H -0.0242 0.5431 0.1086 0.100 Uiso 1.00 1 c R . .
 H(48) H -0.0056 0.5362 0.0353 0.134 Uiso 1.00 1 c R . .
 H(49) H 0.0392 0.6485 0.0246 0.086 Uiso 1.00 1 c R . .
 H(50) H 0.0478 0.7807 0.0708 0.117 Uiso 1.00 1 c R . .
 H(51) H 0.0288 0.7903 0.1440 0.100 Uiso 1.00 1 c R . .


loop_
_atom_site_aniso_label
_atom_site_aniso_U_11
_atom_site_aniso_U_22
_atom_site_aniso_U_33
_atom_site_aniso_U_12
_atom_site_aniso_U_13
_atom_site_aniso_U_23
 Pt(1) 0.02834(6) 0.02398(6) 0.02202(6) 0.00657(5) 0.01672(6) 0.00300(4)
 Pt(2) 0.02991(10) 0.01980(8) 0.02685(9) 0.0000 0.01734(8) 0.0000
 P(1) 0.0337(4) 0.0237(3) 0.0259(3) 0.0037(3) 0.0206(3) -0.0001(3)
 P(2) 0.0324(4) 0.0263(4) 0.0251(4) 0.0090(3) 0.0191(3) 0.0045(3)
 P(3) 0.0271(4) 0.0230(3) 0.0205(3) -0.0027(3) 0.0144(3) -0.0022(2)
 O(1) 0.0389(13) 0.0383(13) 0.0246(11) 0.0128(11) 0.0211(10) 0.0082(9)
 O(2) 0.0383(13) 0.0389(13) 0.0262(11) 0.0155(11) 0.0222(10) 0.0074(9)
 O(3) 0.0359(12) 0.0283(11) 0.0254(10) 0.0079(10) 0.0200(10) 0.0049(9)
 O(4) 0.0547(16) 0.0286(13) 0.0387(13) -0.0021(11) 0.0284(12) -0.0076(10)
 O(5) 0.040(2) 0.0343(19) 0.052(2) 0.0000 0.0313(18) 0.0000
 C(1) 0.0316(17) 0.0322(17) 0.0252(15) 0.0090(13) 0.0157(14) 0.0086(12)
 C(2) 0.058(2) 0.078(3) 0.038(2) 0.029(2) 0.034(2) 0.024(2)
 C(3) 0.073(3) 0.091(3) 0.041(2) 0.026(2) 0.041(2) 0.027(2)
 C(4) 0.056(2) 0.049(2) 0.0264(18) 0.000(2) 0.0175(17) 0.0122(16)
 C(5) 0.052(2) 0.0328(19) 0.0350(19) 0.0076(17) 0.0180(17) 0.0079(15)
 C(6) 0.042(2) 0.0322(18) 0.0301(16) 0.0049(15) 0.0205(15) 0.0032(13)
 C(7) 0.0221(14) 0.0234(14) 0.0255(14) -0.0037(11) 0.0153(12) -0.0025(11)
 C(8) 0.0275(16) 0.0319(16) 0.0274(15) 0.0026(13) 0.0173(13) 0.0009(13)
 C(9) 0.0339(18) 0.0367(19) 0.0408(19) 0.0023(14) 0.0251(16) -0.0037(15)
 C(10) 0.043(2) 0.0403(19) 0.0430(19) -0.0054(16) 0.0353(17) -0.0084(15)
 C(11) 0.045(2) 0.0357(18) 0.0322(17) -0.0098(15) 0.0296(16) -0.0021(14)
 C(12) 0.0303(16) 0.0274(16) 0.0309(16) -0.0024(12) 0.0193(14) 0.0022(12)
 C(13) 0.045(2) 0.0261(16) 0.0352(17) 0.0091(14) 0.0286(16) 0.0040(13)
 C(14) 0.0376(18) 0.0319(17) 0.0320(16) 0.0110(14) 0.0236(15) 0.0061(13)
 C(15) 0.0364(18) 0.0282(16) 0.0340(17) 0.0001(13) 0.0251(15) -0.0019(13)
 C(16) 0.042(2) 0.045(2) 0.0360(19) 0.0019(17) 0.0243(17) 0.0044(16)
 C(17) 0.034(2) 0.064(2) 0.052(2) -0.0068(19) 0.023(2) 0.002(2)
 C(18) 0.048(2) 0.074(3) 0.059(2) -0.015(2) 0.030(2) 0.012(2)
 C(19) 0.057(2) 0.076(3) 0.054(2) -0.013(2) 0.031(2) 0.020(2)
 C(20) 0.041(2) 0.051(2) 0.045(2) -0.0009(18) 0.0231(19) 0.0119(18)
 C(21) 0.050(2) 0.0278(16) 0.0315(17) -0.0060(15) 0.0280(16) -0.0035(13)
 C(22) 0.069(2) 0.035(2) 0.046(2) 0.004(2) 0.036(2) -0.0041(17)
 C(23) 0.111(4) 0.040(2) 0.057(2) -0.005(2) 0.055(3) -0.014(2)
 C(24) 0.099(4) 0.051(2) 0.044(2) -0.030(2) 0.039(2) -0.026(2)
 C(25) 0.058(2) 0.067(3) 0.046(2) -0.022(2) 0.023(2) -0.015(2)
 C(26) 0.047(2) 0.051(2) 0.040(2) -0.0073(19) 0.0266(18) -0.0108(17)
 C(27) 0.0320(18) 0.043(2) 0.0282(16) 0.0074(15) 0.0190(14) -0.0010(14)
 C(28) 0.065(2) 0.042(2) 0.0308(19) 0.010(2) 0.0241(19) 0.0038(16)
 C(29) 0.076(3) 0.075(3) 0.026(2) 0.025(2) 0.025(2) 0.0053(19)
 C(30) 0.061(2) 0.067(3) 0.033(2) 0.010(2) 0.022(2) -0.010(2)
 C(31) 0.079(3) 0.047(2) 0.049(2) 0.012(2) 0.022(2) -0.011(2)
 C(32) 0.061(2) 0.040(2) 0.033(2) 0.0106(19) 0.0164(19) 0.0003(17)
 C(33) 0.042(2) 0.0313(17) 0.0352(18) 0.0056(15) 0.0275(16) 0.0033(14)
 C(34) 0.042(2) 0.039(2) 0.0382(18) 0.0020(15) 0.0285(17) 0.0005(15)
 C(35) 0.050(2) 0.044(2) 0.055(2) -0.0045(18) 0.037(2) -0.0050(18)
 C(36) 0.072(3) 0.045(2) 0.087(3) -0.008(2) 0.060(3) 0.004(2)
 C(37) 0.076(3) 0.043(2) 0.103(4) 0.011(2) 0.059(3) 0.029(2)
 C(38) 0.052(2) 0.043(2) 0.072(2) 0.0128(19) 0.040(2) 0.025(2)
 C(39) 0.0370(19) 0.038(2) 0.0412(19) -0.0008(16) 0.0211(17) -0.0058(16)
 C(40) 0.079(3) 0.062(3) 0.072(3) -0.028(2) 0.057(2) -0.025(2)
 C(41) 0.098(4) 0.094(4) 0.080(3) -0.029(3) 0.073(3) -0.027(3)
 C(42) 0.095(4) 0.071(3) 0.067(3) 0.021(3) 0.058(3) -0.002(2)
 C(43) 0.133(5) 0.042(2) 0.085(3) 0.023(3) 0.080(4) 0.006(2)
 C(44) 0.090(3) 0.032(2) 0.072(3) 0.008(2) 0.059(3) 0.001(2)
 C(45) 0.0377(17) 0.0250(15) 0.0207(14) -0.0066(13) 0.0181(13) -0.0020(11)
 C(46) 0.0281(16) 0.0346(17) 0.0174(14) -0.0026(13) 0.0122(12) -0.0050(12)
 C(47) 0.0355(19) 0.043(2) 0.0234(16) -0.0003(15) 0.0112(14) -0.0001(14)
 C(48) 0.038(2) 0.061(2) 0.0284(19) 0.0085(19) 0.0071(16) -0.0034(17)
 C(49) 0.0276(19) 0.092(3) 0.0270(19) 0.006(2) 0.0092(16) -0.013(2)
 C(50) 0.033(2) 0.106(4) 0.036(2) -0.009(2) 0.0213(18) -0.004(2)
 C(51) 0.0343(19) 0.070(2) 0.0297(18) -0.0054(19) 0.0185(16) 0.0051(18)
 C(52) 0.0288(16) 0.0353(17) 0.0241(15) -0.0034(13) 0.0165(13) -0.0022(12)
 C(53) 0.102(4) 0.081(3) 0.068(3) -0.057(3) 0.071(3) -0.039(2)
 C(54) 0.102(4) 0.118(5) 0.072(3) -0.066(4) 0.073(3) -0.042(3)
 C(55) 0.063(2) 0.104(4) 0.048(2) -0.009(2) 0.045(2) -0.016(2)
 C(56) 0.178(7) 0.066(3) 0.091(4) -0.018(4) 0.112(5) -0.023(3)
 C(57) 0.128(4) 0.047(2) 0.074(3) -0.031(2) 0.081(3) -0.026(2)
 B(1) 0.0280(17) 0.0292(18) 0.0234(16) 0.0024(14) 0.0152(14) 0.0044(13)
 B(2) 0.0271(17) 0.0255(16) 0.0247(16) -0.0001(14) 0.0169(14) -0.0002(13)
 B(3) 0.0310(19) 0.032(2) 0.043(2) -0.0027(16) 0.0214(18) -0.0043(16)

#==============================================================================

_computing_data_collection            'CrystalClear'
_computing_cell_refinement            'CrystalClear'
_computing_data_reduction             'CrystalStructure'
_computing_structure_solution         'SIR2002'
_computing_structure_refinement       'CRYSTALS'
_computing_publication_material       'CrystalStructure Ver. 3.7.0'
_computing_molecular_graphics          ?

#==============================================================================

# MOLECULAR GEOMETRY

_geom_special_details
;
?    
;

loop_
_geom_bond_atom_site_label_1
_geom_bond_atom_site_label_2
_geom_bond_distance
_geom_bond_publ_flag
_geom_bond_site_symmetry_1
_geom_bond_site_symmetry_2
Pt(1) P(1) 2.2141(12) yes . .
Pt(1) P(2) 2.2133(8) yes . .
Pt(1) O(1) 2.043(2) yes . .
Pt(1) O(2) 2.033(3) yes . .
Pt(2) P(3) 2.2259(7) yes . .
Pt(2) P(3) 2.2259(7) no . 55502
Pt(2) O(4) 2.042(2) yes . .
Pt(2) O(4) 2.042(2) no . 55502
P(1) C(13) 1.836(3) no . .
P(1) C(15) 1.811(4) no . .
P(1) C(21) 1.812(3) no . .
P(2) C(14) 1.830(4) no . .
P(2) C(27) 1.817(3) no . .
P(2) C(33) 1.813(4) no . .
P(3) C(46) 1.821(3) no . .
P(3) C(52) 1.810(4) no . .
O(1) B(1) 1.322(4) yes . .
O(2) B(2) 1.324(4) yes . .
O(3) B(1) 1.398(6) yes . .
O(3) B(2) 1.393(4) yes . .
O(4) B(3) 1.320(4) yes . .
O(5) B(3) 1.391(5) yes . .
O(5) B(3) 1.391(5) no . 55502
C(1) C(2) 1.411(8) no . .
C(1) C(6) 1.376(5) no . .
C(1) B(1) 1.596(5) no . .
C(2) C(3) 1.388(6) no . .
C(3) C(4) 1.378(7) no . .
C(4) C(5) 1.377(8) no . .
C(5) C(6) 1.391(5) no . .
C(7) C(8) 1.398(4) no . .
C(7) C(12) 1.396(4) no . .
C(7) B(2) 1.590(6) no . .
C(8) C(9) 1.393(6) no . .
C(9) C(10) 1.384(5) no . .
C(10) C(11) 1.381(5) no . .
C(11) C(12) 1.391(6) no . .
C(13) C(14) 1.535(5) no . .
C(15) C(16) 1.379(4) no . .
C(15) C(20) 1.385(5) no . .
C(16) C(17) 1.385(8) no . .
C(17) C(18) 1.372(7) no . .
C(18) C(19) 1.374(6) no . .
C(19) C(20) 1.380(9) no . .
C(21) C(22) 1.394(7) no . .
C(21) C(26) 1.365(5) no . .
C(22) C(23) 1.382(6) no . .
C(23) C(24) 1.362(8) no . .
C(24) C(25) 1.374(9) no . .
C(25) C(26) 1.397(6) no . .
C(27) C(28) 1.371(5) no . .
C(27) C(32) 1.375(5) no . .
C(28) C(29) 1.413(5) no . .
C(29) C(30) 1.356(7) no . .
C(30) C(31) 1.369(6) no . .
C(31) C(32) 1.388(6) no . .
C(33) C(34) 1.386(5) no . .
C(33) C(38) 1.392(5) no . .
C(34) C(35) 1.390(7) no . .
C(35) C(36) 1.371(6) no . .
C(36) C(37) 1.382(8) no . .
C(37) C(38) 1.387(9) no . .
C(39) C(40) 1.399(9) no . .
C(39) C(44) 1.392(5) no . .
C(39) B(3) 1.596(7) no . .
C(40) C(41) 1.390(11) no . .
C(41) C(42) 1.369(9) no . .
C(42) C(43) 1.354(12) no . .
C(43) C(44) 1.395(11) no . .
C(45) C(45) 1.547(6) no . 55502
C(46) C(47) 1.396(4) no . .
C(46) C(51) 1.381(7) no . .
C(47) C(48) 1.386(6) no . .
C(48) C(49) 1.377(8) no . .
C(49) C(50) 1.366(7) no . .
C(50) C(51) 1.395(6) no . .
C(52) C(53) 1.380(8) no . .
C(52) C(57) 1.370(6) no . .
C(53) C(54) 1.400(12) no . .
C(54) C(55) 1.363(9) no . .
C(55) C(56) 1.344(11) no . .
C(56) C(57) 1.389(13) no . .


loop_
_geom_angle_atom_site_label_1
_geom_angle_atom_site_label_2
_geom_angle_atom_site_label_3
_geom_angle
_geom_angle_publ_flag
_geom_angle_site_symmetry_1
_geom_angle_site_symmetry_2
_geom_angle_site_symmetry_3
P(1) Pt(1) P(2) 86.62(4) no . . .
P(1) Pt(1) O(1) 91.94(9) no . . .
P(1) Pt(1) O(2) 176.32(8) no . . .
P(2) Pt(1) O(1) 178.31(10) no . . .
P(2) Pt(1) O(2) 90.06(7) no . . .
O(1) Pt(1) O(2) 91.40(11) yes . . .
P(3) Pt(2) P(3) 85.55(2) no . . 55502
P(3) Pt(2) O(4) 92.62(8) no . . .
P(3) Pt(2) O(4) 172.77(10) no . . 55502
P(3) Pt(2) O(4) 172.77(10) no 55502 . .
P(3) Pt(2) O(4) 92.62(8) no 55502 . 55502
O(4) Pt(2) O(4) 90.04(11) yes . . 55502
Pt(1) P(1) C(13) 108.68(17) no . . .
Pt(1) P(1) C(15) 115.09(13) no . . .
Pt(1) P(1) C(21) 117.91(16) no . . .
C(13) P(1) C(15) 106.33(19) no . . .
C(13) P(1) C(21) 105.27(15) no . . .
C(15) P(1) C(21) 102.6(2) no . . .
Pt(1) P(2) C(14) 108.18(13) no . . .
Pt(1) P(2) C(27) 117.89(12) no . . .
Pt(1) P(2) C(33) 112.59(10) no . . .
C(14) P(2) C(27) 103.58(17) no . . .
C(14) P(2) C(33) 106.10(19) no . . .
C(27) P(2) C(33) 107.5(2) no . . .
Pt(2) P(3) C(45) 108.99(11) no . . .
Pt(2) P(3) C(46) 111.16(13) no . . .
Pt(2) P(3) C(52) 120.55(11) no . . .
C(45) P(3) C(46) 102.72(16) no . . .
C(45) P(3) C(52) 106.40(19) no . . .
C(46) P(3) C(52) 105.50(15) no . . .
Pt(1) O(1) B(1) 124.6(2) yes . . .
Pt(1) O(2) B(2) 125.4(2) yes . . .
B(1) O(3) B(2) 126.7(2) yes . . .
Pt(2) O(4) B(3) 124.4(2) yes . . .
B(3) O(5) B(3) 125.4(3) yes . . 55502
C(2) C(1) C(6) 117.3(3) no . . .
C(2) C(1) B(1) 119.6(3) no . . .
C(6) C(1) B(1) 123.1(4) no . . .
C(1) C(2) C(3) 120.8(5) no . . .
C(2) C(3) C(4) 120.3(6) no . . .
C(3) C(4) C(5) 119.7(4) no . . .
C(4) C(5) C(6) 119.9(4) no . . .
C(1) C(6) C(5) 121.9(4) no . . .
C(8) C(7) C(12) 117.7(3) no . . .
C(8) C(7) B(2) 121.9(3) no . . .
C(12) C(7) B(2) 120.4(2) no . . .
C(7) C(8) C(9) 121.0(3) no . . .
C(8) C(9) C(10) 120.2(3) no . . .
C(9) C(10) C(11) 119.7(4) no . . .
C(10) C(11) C(12) 120.1(3) no . . .
C(7) C(12) C(11) 121.3(3) no . . .
P(1) C(13) C(14) 109.3(2) no . . .
P(2) C(14) C(13) 107.7(2) no . . .
P(1) C(15) C(16) 121.8(3) no . . .
P(1) C(15) C(20) 118.7(3) no . . .
C(16) C(15) C(20) 119.4(4) no . . .
C(15) C(16) C(17) 120.3(3) no . . .
C(16) C(17) C(18) 119.8(4) no . . .
C(17) C(18) C(19) 120.1(6) no . . .
C(18) C(19) C(20) 120.3(5) no . . .
C(15) C(20) C(19) 119.9(3) no . . .
P(1) C(21) C(22) 119.8(2) no . . .
P(1) C(21) C(26) 121.0(3) no . . .
C(22) C(21) C(26) 119.2(3) no . . .
C(21) C(22) C(23) 120.0(4) no . . .
C(22) C(23) C(24) 120.4(6) no . . .
C(23) C(24) C(25) 120.2(4) no . . .
C(24) C(25) C(26) 119.7(4) no . . .
C(21) C(26) C(25) 120.4(5) no . . .
P(2) C(27) C(28) 119.4(3) no . . .
P(2) C(27) C(32) 121.1(2) no . . .
C(28) C(27) C(32) 119.4(3) no . . .
C(27) C(28) C(29) 119.9(4) no . . .
C(28) C(29) C(30) 120.0(3) no . . .
C(29) C(30) C(31) 119.8(4) no . . .
C(30) C(31) C(32) 120.7(4) no . . .
C(27) C(32) C(31) 120.1(3) no . . .
P(2) C(33) C(34) 118.4(2) no . . .
P(2) C(33) C(38) 122.4(3) no . . .
C(34) C(33) C(38) 119.2(4) no . . .
C(33) C(34) C(35) 120.4(3) no . . .
C(34) C(35) C(36) 120.2(4) no . . .
C(35) C(36) C(37) 119.9(5) no . . .
C(36) C(37) C(38) 120.4(4) no . . .
C(33) C(38) C(37) 119.9(4) no . . .
C(40) C(39) C(44) 115.3(5) no . . .
C(40) C(39) B(3) 120.9(4) no . . .
C(44) C(39) B(3) 123.8(5) no . . .
C(39) C(40) C(41) 122.1(5) no . . .
C(40) C(41) C(42) 120.8(7) no . . .
C(41) C(42) C(43) 118.5(7) no . . .
C(42) C(43) C(44) 121.4(5) no . . .
C(39) C(44) C(43) 121.9(6) no . . .
P(3) C(45) C(45) 107.6(2) no . . 55502
P(3) C(46) C(47) 120.3(3) no . . .
P(3) C(46) C(51) 120.2(2) no . . .
C(47) C(46) C(51) 119.2(3) no . . .
C(46) C(47) C(48) 119.9(4) no . . .
C(47) C(48) C(49) 120.1(4) no . . .
C(48) C(49) C(50) 120.5(4) no . . .
C(49) C(50) C(51) 119.8(5) no . . .
C(46) C(51) C(50) 120.4(4) no . . .
P(3) C(52) C(53) 122.2(3) no . . .
P(3) C(52) C(57) 119.1(4) no . . .
C(53) C(52) C(57) 118.7(5) no . . .
C(52) C(53) C(54) 119.7(5) no . . .
C(53) C(54) C(55) 120.4(6) no . . .
C(54) C(55) C(56) 119.6(7) no . . .
C(55) C(56) C(57) 120.8(5) no . . .
C(52) C(57) C(56) 120.5(5) no . . .
O(1) B(1) O(3) 126.0(3) yes . . .
O(1) B(1) C(1) 119.8(4) no . . .
O(3) B(1) C(1) 114.2(3) no . . .
O(2) B(2) O(3) 125.5(4) yes . . .
O(2) B(2) C(7) 118.1(3) no . . .
O(3) B(2) C(7) 116.3(2) no . . .
O(4) B(3) O(5) 124.8(4) yes . . .
O(4) B(3) C(39) 118.7(4) no . . .
O(5) B(3) C(39) 116.5(3) no . . .

data_form2

# CHEMICAL DATA

_chemical_formula_sum                  'C84 H76 B4 O10 P4 Pt2 '
_chemical_formula_moiety               'C84 H76 B4 O10 P4 Pt2 '
_chemical_formula_weight               1802.83
_chemical_melting_point                ?
_chemical_absolute_configuration       'CHOOSE rm ad rmad syn or unk'

#==============================================================================

# CRYSTAL DATA
_symmetry_cell_setting                 orthorhombic
_symmetry_space_group_name_H-M        'P c a 21'
_symmetry_space_group_name_Hall       'P 2c -2ac'
_symmetry_Int_Tables_number            29
loop_
_symmetry_equiv_pos_site_id
_symmetry_equiv_pos_as_xyz
1   '+X,+Y,+Z'
2   '1/2-X,+Y,1/2+Z'
3   '1/2+X,-Y,+Z'
4   '-X,-Y,1/2+Z'

#------------------------------------------------------------------------------

_cell_length_a                         16.0265(17)
_cell_length_b                         21.295(2)
_cell_length_c                         22.041(2)
_cell_angle_alpha                      90.0000
_cell_angle_beta                       90.0000
_cell_angle_gamma                      90.0000
_cell_volume                           7522.3(14)
_cell_formula_units_Z                  4
_cell_measurement_reflns_used          19075
_cell_measurement_theta_min            3.0
_cell_measurement_theta_max            27.5
_cell_measurement_temperature          113.1

#------------------------------------------------------------------------------

_exptl_crystal_description            'prism'
_exptl_crystal_colour                 'colorless'
_exptl_crystal_size_max                0.25
_exptl_crystal_size_mid                0.25
_exptl_crystal_size_min                0.10
_exptl_crystal_density_diffrn          1.592
_exptl_crystal_density_meas            ?
_exptl_crystal_density_method         'not measured'
_exptl_crystal_F_000                   3584.00
_exptl_absorpt_coefficient_mu          3.846
_exptl_absorpt_correction_type         none
_exptl_absorpt_correction_T_min        0.000
_exptl_absorpt_correction_T_max        0.000

#==============================================================================

# EXPERIMENTAL DATA

_diffrn_radiation_type                'Mo K\a'
_diffrn_radiation_wavelength           0.71070
_diffrn_measurement_device_type       'Rigaku Saturn'
_diffrn_measurement_method             \w
_diffrn_detector_area_resol_mean       7.31
_diffrn_reflns_number                  54896
_diffrn_reflns_av_R_equivalents        0.089
_diffrn_reflns_theta_max               27.48
_diffrn_measured_fraction_theta_max    0.995
_diffrn_reflns_theta_full              27.48
_diffrn_measured_fraction_theta_full   0.995
_diffrn_reflns_limit_h_min             -17
_diffrn_reflns_limit_h_max             20
_diffrn_reflns_limit_k_min             -27
_diffrn_reflns_limit_k_max             27
_diffrn_reflns_limit_l_min             -28
_diffrn_reflns_limit_l_max             28

#==============================================================================

# REFINEMENT DATA

_refine_special_details
;
    Refinement using all reflections. The weighted 
    R-factor (wR) and goodness of fit (S) are based on F^2^.
    R-factor (gt) are based on F. The threshold expression of
    F^2^ > 2.0 sigma(F^2^) is used only for calculating R-factor (gt).
;
_reflns_number_total                   8823
_reflns_number_gt                      6361
_reflns_threshold_expression           F^2^>2.0\s(F^2^)
_refine_ls_structure_factor_coef       Fsqd
_refine_ls_R_factor_gt                 0.0300
_refine_ls_wR_factor_ref               0.0892
_refine_ls_hydrogen_treatment          refall
_refine_ls_number_reflns               8823
_refine_ls_number_parameters           1014
_refine_ls_goodness_of_fit_ref         0.837
_refine_ls_weighting_scheme            calc
_refine_ls_weighting_details
'w = 1/[0.0001Fo^2^ + 0.4000\s(Fo^2^) + 0.0001]/(4Fo^2^)'
_refine_ls_shift/su_max                0.0036
_refine_diff_density_max               1.84
_refine_diff_density_min               -1.00
_refine_ls_extinction_method           none
_refine_ls_extinction_coef             ?
_refine_ls_abs_structure_details
   'Flack, H. D. (1983), Acta Cryst. A39, 876-881.  0 Friedel Pairs'
_refine_ls_abs_structure_Flack         0.441(15)

loop_
_atom_type_symbol
_atom_type_description
_atom_type_scat_dispersion_real
_atom_type_scat_dispersion_imag
_atom_type_scat_source
  'C' 'C'  0.003 0.002 
;
International Tables for Crystallography
(1992, Vol. C, Tables 4.2.6.8 and 6.1.1.4)
;
  'H' 'H'  0.000 0.000 
;
International Tables for Crystallography
(1992, Vol. C, Table 6.1.1.4)
;
  'O' 'O'  0.011 0.006 
;
International Tables for Crystallography
(1992, Vol. C, Tables 4.2.6.8 and 6.1.1.4)
;
  'P' 'P'  0.102 0.094 
;
International Tables for Crystallography
(1992, Vol. C, Tables 4.2.6.8 and 6.1.1.4)
;
  'Pt' 'Pt'  -1.703 8.390 
;
International Tables for Crystallography
(1992, Vol. C, Tables 4.2.6.8 and 6.1.1.4)
;
  'B' 'B'  0.001 0.001 
;
International Tables for Crystallography
(1992, Vol. C, Tables 4.2.6.8 and 6.1.1.4)
;

#==============================================================================

# ATOMIC COORDINATES AND THERMAL PARAMETERS

loop_
_atom_site_label
_atom_site_type_symbol
_atom_site_fract_x
_atom_site_fract_y
_atom_site_fract_z
_atom_site_U_iso_or_equiv
_atom_site_adp_type
_atom_site_occupancy
_atom_site_symmetry_multiplicity
_atom_site_calc_flag
_atom_site_refinement_flags
_atom_site_disorder_assembly
_atom_site_disorder_group
 Pt(1) Pt 0.32903(2) 0.46613(2) 0.15742(6) 0.01741(7) Uani 1.00 1 d . . .
 Pt(2) Pt 0.32234(2) 0.94994(2) 0.28968(6) 0.01568(7) Uani 1.00 1 d . . .
 P(1) P 0.42765(13) 0.51355(11) 0.10447(12) 0.0190(5) Uani 1.00 1 d . . .
 P(2) P 0.36920(14) 0.52501(12) 0.23481(12) 0.0198(5) Uani 1.00 1 d . . .
 P(3) P 0.34758(14) 1.01808(12) 0.21633(11) 0.0174(5) Uani 1.00 1 d . . .
 P(4) P 0.41207(13) 1.00558(12) 0.34537(11) 0.0180(5) Uani 1.00 1 d . . .
 O(1) O 0.2942(3) 0.4101(3) 0.0876(2) 0.0242(17) Uani 1.00 1 d . . .
 O(2) O 0.2416(3) 0.4274(3) 0.2126(3) 0.0262(17) Uani 1.00 1 d . . .
 O(3) O 0.1895(3) 0.3499(3) 0.1417(2) 0.0233(17) Uani 1.00 1 d . . .
 O(4) O 0.0709(4) 0.2218(3) -0.1457(3) 0.038(2) Uani 1.00 1 d . . .
 O(5) O -0.0611(5) 0.2367(3) 0.3885(4) 0.048(2) Uani 1.00 1 d . . .
 O(6) O 0.2390(3) 0.9031(2) 0.2355(2) 0.0213(16) Uani 1.00 1 d . . .
 O(7) O 0.2978(3) 0.8884(2) 0.3592(2) 0.0209(16) Uani 1.00 1 d . . .
 O(8) O 0.1715(3) 0.8444(2) 0.3165(2) 0.0193(16) Uani 1.00 1 d . . .
 O(9) O -0.1227(6) 0.7362(5) 0.0987(5) 0.075(3) Uani 1.00 1 d . . .
 O(10) O 0.0721(4) 0.7352(3) 0.6140(3) 0.040(2) Uani 1.00 1 d . . .
 C(1) C 0.2107(5) 0.3296(4) 0.0302(4) 0.022(2) Uani 1.00 1 d . . .
 C(2) C 0.1406(5) 0.2939(4) 0.0242(4) 0.025(2) Uani 1.00 1 d . . .
 C(3) C 0.1177(6) 0.2664(5) -0.0311(5) 0.031(2) Uani 1.00 1 d . . .
 C(4) C 0.1674(5) 0.2742(4) -0.0823(5) 0.028(2) Uani 1.00 1 d . . .
 C(5) C 0.2416(6) 0.3074(4) -0.0759(5) 0.032(2) Uani 1.00 1 d . . .
 C(6) C 0.2616(6) 0.3351(5) -0.0216(4) 0.030(2) Uani 1.00 1 d . . .
 C(7) C 0.1371(6) 0.2487(4) -0.1416(5) 0.031(2) Uani 1.00 1 d . . .
 C(8) C 0.1915(8) 0.2578(7) -0.1965(5) 0.063(4) Uani 1.00 1 d . . .
 C(9) C 0.1348(5) 0.3528(4) 0.2493(4) 0.023(2) Uani 1.00 1 d . . .
 C(10) C 0.1297(6) 0.3843(5) 0.3051(4) 0.030(2) Uani 1.00 1 d . . .
 C(11) C 0.0768(6) 0.3649(5) 0.3511(5) 0.034(2) Uani 1.00 1 d . . .
 C(12) C 0.0279(6) 0.3114(4) 0.3434(5) 0.029(2) Uani 1.00 1 d . . .
 C(13) C 0.0320(5) 0.2798(3) 0.2880(5) 0.031(2) Uani 1.00 1 d . . .
 C(14) C 0.0828(5) 0.3002(4) 0.2418(4) 0.025(2) Uani 1.00 1 d . . .
 C(15) C -0.0286(6) 0.2874(5) 0.3926(5) 0.038(3) Uani 1.00 1 d . . .
 C(16) C -0.0451(8) 0.3276(6) 0.4469(5) 0.056(4) Uani 1.00 1 d . . .
 C(17) C 0.4618(5) 0.5825(4) 0.1472(4) 0.023(2) Uani 1.00 1 d . . .
 C(18) C 0.4661(5) 0.5630(4) 0.2142(4) 0.025(2) Uani 1.00 1 d . . .
 C(19) C 0.5201(5) 0.4664(4) 0.0938(4) 0.018(2) Uani 1.00 1 d . . .
 C(20) C 0.5183(5) 0.4021(4) 0.1051(4) 0.025(2) Uani 1.00 1 d . . .
 C(21) C 0.5889(6) 0.3662(4) 0.0968(5) 0.032(2) Uani 1.00 1 d . . .
 C(22) C 0.6618(6) 0.3927(5) 0.0759(5) 0.031(2) Uani 1.00 1 d . . .
 C(23) C 0.6664(6) 0.4559(5) 0.0657(5) 0.031(3) Uani 1.00 1 d . . .
 C(24) C 0.5962(5) 0.4937(4) 0.0735(4) 0.023(2) Uani 1.00 1 d . . .
 C(25) C 0.3969(5) 0.5393(4) 0.0293(4) 0.021(2) Uani 1.00 1 d . . .
 C(26) C 0.3828(5) 0.6018(5) 0.0132(5) 0.029(2) Uani 1.00 1 d . . .
 C(27) C 0.3503(7) 0.6165(5) -0.0426(5) 0.037(3) Uani 1.00 1 d . . .
 C(28) C 0.3334(5) 0.5708(5) -0.0831(5) 0.030(2) Uani 1.00 1 d . . .
 C(29) C 0.3452(7) 0.5096(5) -0.0686(5) 0.039(3) Uani 1.00 1 d . . .
 C(30) C 0.3791(7) 0.4923(5) -0.0130(5) 0.033(3) Uani 1.00 1 d . . .
 C(31) C 0.3932(5) 0.4817(5) 0.3031(4) 0.024(2) Uani 1.00 1 d . . .
 C(32) C 0.4457(6) 0.4293(5) 0.2986(5) 0.041(3) Uani 1.00 1 d . . .
 C(33) C 0.4681(8) 0.3956(6) 0.3495(6) 0.055(4) Uani 1.00 1 d . . .
 C(34) C 0.4374(6) 0.4131(5) 0.4067(6) 0.042(3) Uani 1.00 1 d . . .
 C(35) C 0.3866(8) 0.4624(6) 0.4105(5) 0.049(3) Uani 1.00 1 d . . .
 C(36) C 0.3638(7) 0.4985(6) 0.3599(5) 0.041(3) Uani 1.00 1 d . . .
 C(37) C 0.2988(5) 0.5878(4) 0.2572(4) 0.024(2) Uani 1.00 1 d . . .
 C(38) C 0.3259(5) 0.6364(4) 0.2960(5) 0.028(2) Uani 1.00 1 d . . .
 C(39) C 0.2730(6) 0.6842(4) 0.3121(4) 0.031(2) Uani 1.00 1 d . . .
 C(40) C 0.1927(5) 0.6848(4) 0.2913(5) 0.029(2) Uani 1.00 1 d . . .
 C(41) C 0.1639(6) 0.6371(5) 0.2538(4) 0.031(2) Uani 1.00 1 d . . .
 C(42) C 0.2174(5) 0.5884(5) 0.2362(4) 0.027(2) Uani 1.00 1 d . . .
 C(43) C 0.1119(5) 0.8415(4) 0.2093(4) 0.018(2) Uani 1.00 1 d . . .
 C(44) C 0.1080(5) 0.8652(4) 0.1515(5) 0.025(2) Uani 1.00 1 d . . .
 C(45) C 0.0484(5) 0.8465(4) 0.1084(4) 0.026(2) Uani 1.00 1 d . . .
 C(46) C -0.0095(5) 0.7996(4) 0.1252(4) 0.027(2) Uani 1.00 1 d . . .
 C(47) C -0.0065(5) 0.7754(4) 0.1831(4) 0.027(2) Uani 1.00 1 d . . .
 C(48) C 0.0512(5) 0.7961(5) 0.2253(4) 0.024(2) Uani 1.00 1 d . . .
 C(49) C -0.0750(6) 0.7765(5) 0.0820(5) 0.039(3) Uani 1.00 1 d . . .
 C(50) C -0.0793(8) 0.8050(5) 0.0199(5) 0.051(3) Uani 1.00 1 d . . .
 C(51) C 0.2101(5) 0.8194(4) 0.4249(4) 0.020(2) Uani 1.00 1 d . . .
 C(52) C 0.1283(5) 0.7978(4) 0.4383(4) 0.023(2) Uani 1.00 1 d . . .
 C(53) C 0.1105(6) 0.7745(5) 0.4960(4) 0.027(2) Uani 1.00 1 d . . .
 C(54) C 0.1706(5) 0.7717(4) 0.5419(4) 0.020(2) Uani 1.00 1 d . . .
 C(55) C 0.2510(7) 0.7906(4) 0.5283(4) 0.025(2) Uani 1.00 1 d . . .
 C(56) C 0.2699(5) 0.8132(4) 0.4703(4) 0.021(2) Uani 1.00 1 d . . .
 C(57) C 0.1441(6) 0.7521(4) 0.6039(5) 0.029(2) Uani 1.00 1 d . . .
 C(58) C 0.2056(7) 0.7540(5) 0.6547(5) 0.040(2) Uani 1.00 1 d . . .
 C(59) C 0.4379(5) 1.0646(4) 0.2386(4) 0.021(2) Uani 1.00 1 d . . .
 C(60) C 0.4318(5) 1.0789(4) 0.3062(4) 0.023(2) Uani 1.00 1 d . . .
 C(61) C 0.2619(5) 1.0726(4) 0.2037(4) 0.021(2) Uani 1.00 1 d . . .
 C(62) C 0.2733(6) 1.1326(4) 0.1820(4) 0.027(2) Uani 1.00 1 d . . .
 C(63) C 0.2050(7) 1.1708(5) 0.1692(5) 0.036(3) Uani 1.00 1 d . . .
 C(64) C 0.1255(6) 1.1487(5) 0.1775(4) 0.033(2) Uani 1.00 1 d . . .
 C(65) C 0.1136(6) 1.0895(5) 0.1990(5) 0.033(2) Uani 1.00 1 d . . .
 C(66) C 0.1816(5) 1.0499(4) 0.2122(4) 0.022(2) Uani 1.00 1 d . . .
 C(67) C 0.3754(5) 0.9866(4) 0.1425(4) 0.017(2) Uani 1.00 1 d . . .
 C(68) C 0.3771(6) 1.0241(5) 0.0916(4) 0.031(2) Uani 1.00 1 d . . .
 C(69) C 0.4068(7) 1.0029(5) 0.0368(4) 0.035(2) Uani 1.00 1 d . . .
 C(70) C 0.4358(5) 0.9421(5) 0.0331(4) 0.031(2) Uani 1.00 1 d . . .
 C(71) C 0.4359(6) 0.9035(5) 0.0847(5) 0.032(2) Uani 1.00 1 d . . .
 C(72) C 0.4043(5) 0.9254(4) 0.1388(4) 0.024(2) Uani 1.00 1 d . . .
 C(73) C 0.5124(5) 0.9674(4) 0.3556(4) 0.019(2) Uani 1.00 1 d . . .
 C(74) C 0.5836(5) 1.0015(5) 0.3684(4) 0.028(2) Uani 1.00 1 d . . .
 C(75) C 0.6597(6) 0.9708(5) 0.3796(5) 0.025(2) Uani 1.00 1 d . . .
 C(76) C 0.6624(6) 0.9062(6) 0.3780(5) 0.038(3) Uani 1.00 1 d . . .
 C(77) C 0.5924(6) 0.8714(5) 0.3652(5) 0.034(3) Uani 1.00 1 d . . .
 C(78) C 0.5168(5) 0.9014(4) 0.3551(4) 0.027(2) Uani 1.00 1 d . . .
 C(79) C 0.3800(5) 1.0265(4) 0.4221(4) 0.019(2) Uani 1.00 1 d . . .
 C(80) C 0.3571(7) 0.9770(5) 0.4601(5) 0.035(3) Uani 1.00 1 d . . .
 C(81) C 0.3304(7) 0.9908(6) 0.5195(5) 0.038(3) Uani 1.00 1 d . . .
 C(82) C 0.3266(6) 1.0530(6) 0.5394(4) 0.036(3) Uani 1.00 1 d . . .
 C(83) C 0.3504(6) 1.1009(5) 0.5013(5) 0.033(2) Uani 1.00 1 d . . .
 C(84) C 0.3770(6) 1.0881(5) 0.4424(4) 0.027(2) Uani 1.00 1 d . . .
 B(1) B 0.2352(6) 0.3655(5) 0.0914(5) 0.020(2) Uani 1.00 1 d . . .
 B(2) B 0.1936(6) 0.3787(5) 0.1985(4) 0.018(2) Uani 1.00 1 d . . .
 B(3) B 0.1801(6) 0.8655(4) 0.2579(5) 0.018(2) Uani 1.00 1 d . . .
 B(4) B 0.2316(5) 0.8536(5) 0.3624(4) 0.018(2) Uani 1.00 1 d . . .
 H(1) H 0.1057 0.2875 0.0584 0.030 Uiso 1.00 1 c R . .
 H(2) H 0.0679 0.2425 -0.0343 0.038 Uiso 1.00 1 c R . .
 H(3) H 0.2774 0.3104 -0.1101 0.039 Uiso 1.00 1 c R . .
 H(4) H 0.3120 0.3584 -0.0194 0.036 Uiso 1.00 1 c R . .
 H(5) H 0.2282 0.2233 -0.2025 0.075 Uiso 1.00 1 c R . .
 H(6) H 0.2232 0.2950 -0.1904 0.075 Uiso 1.00 1 c R . .
 H(7) H 0.1569 0.2627 -0.2311 0.075 Uiso 1.00 1 c R . .
 H(8) H 0.1637 0.4205 0.3101 0.036 Uiso 1.00 1 c R . .
 H(9) H 0.0737 0.3888 0.3874 0.041 Uiso 1.00 1 c R . .
 H(10) H -0.0008 0.2434 0.2813 0.037 Uiso 1.00 1 c R . .
 H(11) H 0.0838 0.2797 0.2035 0.030 Uiso 1.00 1 c R . .
 H(12) H -0.0925 0.3535 0.4402 0.067 Uiso 1.00 1 c R . .
 H(13) H 0.0028 0.3532 0.4528 0.067 Uiso 1.00 1 c R . .
 H(14) H -0.0540 0.3025 0.4820 0.067 Uiso 1.00 1 c R . .
 H(15) H 0.5148 0.5958 0.1328 0.028 Uiso 1.00 1 c R . .
 H(16) H 0.4227 0.6157 0.1428 0.028 Uiso 1.00 1 c R . .
 H(17) H 0.4750 0.5989 0.2390 0.030 Uiso 1.00 1 c R . .
 H(18) H 0.5109 0.5343 0.2195 0.030 Uiso 1.00 1 c R . .
 H(19) H 0.4678 0.3828 0.1177 0.030 Uiso 1.00 1 c R . .
 H(20) H 0.5885 0.3227 0.1065 0.038 Uiso 1.00 1 c R . .
 H(21) H 0.7080 0.3666 0.0662 0.037 Uiso 1.00 1 c R . .
 H(22) H 0.7180 0.4737 0.0534 0.037 Uiso 1.00 1 c R . .
 H(23) H 0.5987 0.5378 0.0672 0.027 Uiso 1.00 1 c R . .
 H(24) H 0.3977 0.6337 0.0413 0.035 Uiso 1.00 1 c R . .
 H(25) H 0.3390 0.6592 -0.0523 0.044 Uiso 1.00 1 c R . .
 H(26) H 0.3137 0.5817 -0.1224 0.036 Uiso 1.00 1 c R . .
 H(27) H 0.3307 0.4775 -0.0966 0.047 Uiso 1.00 1 c R . .
 H(28) H 0.3894 0.4497 -0.0025 0.040 Uiso 1.00 1 c R . .
 H(29) H 0.4659 0.4163 0.2601 0.049 Uiso 1.00 1 c R . .
 H(30) H 0.5028 0.3596 0.3452 0.066 Uiso 1.00 1 c R . .
 H(31) H 0.4534 0.3921 0.4429 0.051 Uiso 1.00 1 c R . .
 H(32) H 0.3622 0.4733 0.4483 0.059 Uiso 1.00 1 c R . .
 H(33) H 0.3280 0.5336 0.3649 0.050 Uiso 1.00 1 c R . .
 H(34) H 0.3820 0.6369 0.3100 0.033 Uiso 1.00 1 c R . .
 H(35) H 0.2939 0.7178 0.3361 0.038 Uiso 1.00 1 c R . .
 H(36) H 0.1567 0.7166 0.3063 0.035 Uiso 1.00 1 c R . .
 H(37) H 0.1082 0.6392 0.2393 0.037 Uiso 1.00 1 c R . .
 H(38) H 0.1985 0.5563 0.2097 0.032 Uiso 1.00 1 c R . .
 H(39) H 0.1500 0.8939 0.1389 0.030 Uiso 1.00 1 c R . .
 H(40) H 0.0445 0.8654 0.0695 0.031 Uiso 1.00 1 c R . .
 H(41) H -0.0463 0.7444 0.1940 0.032 Uiso 1.00 1 c R . .
 H(42) H 0.0518 0.7784 0.2649 0.029 Uiso 1.00 1 c R . .
 H(43) H -0.0451 0.7818 -0.0073 0.061 Uiso 1.00 1 c R . .
 H(44) H -0.0597 0.8471 0.0221 0.061 Uiso 1.00 1 c R . .
 H(45) H -0.1352 0.8048 0.0057 0.061 Uiso 1.00 1 c R . .
 H(46) H 0.0866 0.7987 0.4077 0.028 Uiso 1.00 1 c R . .
 H(47) H 0.0560 0.7593 0.5041 0.032 Uiso 1.00 1 c R . .
 H(48) H 0.2936 0.7868 0.5580 0.030 Uiso 1.00 1 c R . .
 H(49) H 0.3253 0.8259 0.4609 0.026 Uiso 1.00 1 c R . .
 H(50) H 0.2046 0.7949 0.6719 0.047 Uiso 1.00 1 c R . .
 H(51) H 0.2601 0.7451 0.6400 0.048 Uiso 1.00 1 c R . .
 H(52) H 0.1908 0.7240 0.6848 0.047 Uiso 1.00 1 c R . .
 H(53) H 0.4876 1.0417 0.2308 0.025 Uiso 1.00 1 c R . .
 H(54) H 0.4384 1.1026 0.2160 0.025 Uiso 1.00 1 c R . .
 H(55) H 0.3875 1.1076 0.3131 0.028 Uiso 1.00 1 c R . .
 H(56) H 0.4826 1.0966 0.3203 0.028 Uiso 1.00 1 c R . .
 H(57) H 0.3281 1.1478 0.1746 0.033 Uiso 1.00 1 c R . .
 H(58) H 0.2133 1.2129 0.1562 0.044 Uiso 1.00 1 c R . .
 H(59) H 0.0795 1.1748 0.1672 0.039 Uiso 1.00 1 c R . .
 H(60) H 0.0580 1.0752 0.2049 0.040 Uiso 1.00 1 c R . .
 H(61) H 0.1730 1.0081 0.2259 0.026 Uiso 1.00 1 c R . .
 H(62) H 0.3541 1.0652 0.0938 0.037 Uiso 1.00 1 c R . .
 H(63) H 0.4107 1.0300 0.0027 0.042 Uiso 1.00 1 c R . .
 H(64) H 0.4538 0.9269 -0.0052 0.037 Uiso 1.00 1 c R . .
 H(65) H 0.4583 0.8623 0.0819 0.039 Uiso 1.00 1 c R . .
 H(66) H 0.4023 0.8991 0.1736 0.029 Uiso 1.00 1 c R . .
 H(67) H 0.5805 1.0460 0.3711 0.033 Uiso 1.00 1 c R . .
 H(68) H 0.7085 0.9946 0.3879 0.030 Uiso 1.00 1 c R . .
 H(69) H 0.7144 0.8859 0.3847 0.046 Uiso 1.00 1 c R . .
 H(70) H 0.5955 0.8268 0.3646 0.041 Uiso 1.00 1 c R . .
 H(71) H 0.4676 0.8779 0.3475 0.033 Uiso 1.00 1 c R . .
 H(72) H 0.3593 0.9345 0.4469 0.042 Uiso 1.00 1 c R . .
 H(73) H 0.3131 0.9584 0.5463 0.046 Uiso 1.00 1 c R . .
 H(74) H 0.3073 1.0627 0.5791 0.044 Uiso 1.00 1 c R . .
 H(75) H 0.3507 1.1429 0.5159 0.039 Uiso 1.00 1 c R . .
 H(76) H 0.3908 1.1214 0.4156 0.033 Uiso 1.00 1 c R . .


loop_
_atom_site_aniso_label
_atom_site_aniso_U_11
_atom_site_aniso_U_22
_atom_site_aniso_U_33
_atom_site_aniso_U_12
_atom_site_aniso_U_13
_atom_site_aniso_U_23
 Pt(1) 0.01699(14) 0.02426(16) 0.01099(14) -0.00280(12) 0.00037(16) -0.00167(13)
 Pt(2) 0.01541(13) 0.02148(14) 0.01014(14) -0.00255(12) -0.00068(16) 0.00140(13)
 P(1) 0.0202(11) 0.0242(13) 0.0127(11) -0.0036(9) -0.0004(9) 0.0013(9)
 P(2) 0.0215(11) 0.0239(12) 0.0140(11) 0.0010(9) -0.0006(9) -0.0039(9)
 P(3) 0.0193(11) 0.0221(12) 0.0107(10) -0.0022(9) -0.0002(8) 0.0005(8)
 P(4) 0.0196(11) 0.0245(12) 0.0100(10) -0.0051(9) -0.0020(8) 0.0010(9)
 O(1) 0.026(3) 0.033(3) 0.013(3) -0.008(2) 0.000(2) -0.005(2)
 O(2) 0.017(3) 0.047(4) 0.015(3) -0.008(2) 0.006(2) -0.002(3)
 O(3) 0.027(3) 0.028(3) 0.015(3) -0.005(2) 0.012(2) 0.001(2)
 O(4) 0.040(4) 0.039(4) 0.034(4) -0.016(3) -0.000(3) -0.018(3)
 O(5) 0.054(5) 0.042(5) 0.046(5) -0.007(4) 0.019(4) 0.004(4)
 O(6) 0.017(3) 0.028(3) 0.018(3) -0.009(2) -0.004(2) -0.003(2)
 O(7) 0.019(3) 0.027(3) 0.017(3) -0.001(2) -0.001(2) 0.007(2)
 O(8) 0.019(3) 0.023(3) 0.017(3) -0.001(2) 0.003(2) 0.003(2)
 O(9) 0.078(7) 0.077(7) 0.070(7) -0.038(6) -0.040(6) 0.018(6)
 O(10) 0.042(4) 0.057(5) 0.022(4) -0.024(3) -0.002(3) 0.008(3)
 C(1) 0.022(4) 0.025(4) 0.018(4) 0.001(3) -0.002(3) -0.000(3)
 C(2) 0.024(4) 0.030(5) 0.021(5) -0.008(4) 0.006(4) -0.002(4)
 C(3) 0.027(5) 0.042(6) 0.025(5) -0.022(4) 0.004(4) -0.008(4)
 C(4) 0.031(5) 0.031(5) 0.022(5) -0.010(4) -0.010(4) -0.002(4)
 C(5) 0.034(5) 0.039(5) 0.025(5) -0.008(4) 0.004(4) -0.016(4)
 C(6) 0.024(4) 0.046(6) 0.021(5) -0.013(4) -0.003(4) -0.003(4)
 C(7) 0.036(5) 0.028(5) 0.030(6) -0.007(4) 0.002(4) -0.012(4)
 C(8) 0.057(7) 0.101(11) 0.030(8) -0.029(7) 0.010(5) -0.040(7)
 C(9) 0.018(4) 0.027(5) 0.023(5) 0.000(3) -0.000(3) 0.004(4)
 C(10) 0.030(5) 0.039(6) 0.022(5) -0.007(4) -0.005(3) -0.001(4)
 C(11) 0.031(5) 0.044(6) 0.027(5) -0.008(4) -0.001(4) 0.004(5)
 C(12) 0.030(5) 0.023(5) 0.036(6) 0.010(4) 0.010(4) 0.009(4)
 C(13) 0.040(5) 0.010(3) 0.043(5) -0.001(3) 0.018(5) 0.001(5)
 C(14) 0.023(4) 0.024(5) 0.027(5) 0.007(3) 0.012(4) -0.001(4)
 C(15) 0.039(6) 0.033(6) 0.042(6) 0.004(4) 0.024(5) 0.011(5)
 C(16) 0.081(9) 0.060(8) 0.027(6) -0.019(7) 0.024(6) 0.010(6)
 C(17) 0.025(4) 0.028(4) 0.017(5) -0.007(3) 0.002(3) 0.000(3)
 C(18) 0.023(4) 0.040(6) 0.012(4) 0.001(4) -0.001(3) -0.002(4)
 C(19) 0.018(4) 0.022(4) 0.014(4) 0.000(3) 0.008(3) 0.001(3)
 C(20) 0.008(3) 0.044(6) 0.022(5) -0.008(3) 0.003(3) 0.003(4)
 C(21) 0.036(5) 0.022(5) 0.038(6) 0.004(4) -0.009(4) 0.005(4)
 C(22) 0.026(5) 0.044(6) 0.023(5) 0.003(4) -0.000(4) 0.003(4)
 C(23) 0.020(5) 0.052(7) 0.020(5) -0.003(4) 0.002(4) 0.007(4)
 C(24) 0.024(4) 0.025(5) 0.020(4) 0.003(3) -0.005(3) 0.003(4)
 C(25) 0.016(4) 0.032(5) 0.015(4) 0.001(3) 0.009(3) -0.001(3)
 C(26) 0.022(4) 0.038(6) 0.027(5) -0.007(4) -0.001(4) 0.003(4)
 C(27) 0.052(6) 0.023(5) 0.036(6) -0.002(4) -0.008(5) 0.005(4)
 C(28) 0.033(5) 0.033(5) 0.023(5) -0.008(4) -0.002(4) 0.008(4)
 C(29) 0.059(7) 0.042(7) 0.016(5) -0.004(5) -0.011(5) 0.003(4)
 C(30) 0.050(6) 0.029(6) 0.020(5) 0.007(5) -0.004(5) 0.006(4)
 C(31) 0.013(4) 0.037(5) 0.021(5) -0.004(3) -0.010(3) 0.000(4)
 C(32) 0.043(5) 0.060(7) 0.019(5) 0.015(5) 0.002(4) 0.009(5)
 C(33) 0.057(8) 0.061(9) 0.047(8) 0.023(6) -0.017(6) 0.007(7)
 C(34) 0.037(6) 0.047(7) 0.043(7) -0.007(5) -0.015(5) 0.005(5)
 C(35) 0.072(8) 0.056(8) 0.020(5) 0.027(6) 0.006(5) 0.008(5)
 C(36) 0.043(6) 0.049(7) 0.031(6) 0.029(5) -0.006(5) -0.009(5)
 C(37) 0.031(4) 0.025(5) 0.016(4) 0.005(4) 0.003(3) 0.000(3)
 C(38) 0.023(4) 0.031(4) 0.030(5) -0.003(3) -0.010(4) -0.002(4)
 C(39) 0.044(6) 0.025(5) 0.025(5) 0.002(4) 0.005(4) -0.001(4)
 C(40) 0.037(5) 0.026(4) 0.025(4) 0.007(3) 0.007(4) 0.004(5)
 C(41) 0.028(5) 0.038(6) 0.027(5) 0.006(4) -0.002(4) 0.013(4)
 C(42) 0.026(4) 0.037(5) 0.018(4) -0.003(4) 0.002(4) -0.009(4)
 C(43) 0.015(4) 0.020(4) 0.019(4) 0.006(3) -0.006(3) -0.004(3)
 C(44) 0.024(4) 0.029(4) 0.023(4) 0.003(3) 0.002(4) -0.004(4)
 C(45) 0.031(5) 0.038(5) 0.010(4) 0.001(4) -0.000(3) -0.003(4)
 C(46) 0.024(4) 0.032(5) 0.026(5) 0.009(4) -0.009(4) -0.010(4)
 C(47) 0.026(4) 0.016(4) 0.038(5) -0.004(3) -0.009(4) -0.002(4)
 C(48) 0.033(4) 0.028(4) 0.012(4) -0.000(4) -0.002(4) -0.001(3)
 C(49) 0.027(5) 0.046(7) 0.044(7) -0.004(5) -0.008(5) -0.012(5)
 C(50) 0.059(7) 0.049(7) 0.044(7) 0.013(6) -0.027(6) -0.026(6)
 C(51) 0.018(4) 0.018(4) 0.023(4) 0.003(3) -0.002(3) 0.003(3)
 C(52) 0.030(5) 0.023(4) 0.017(4) 0.000(3) -0.002(3) 0.002(3)
 C(53) 0.021(4) 0.041(6) 0.018(5) -0.007(4) 0.001(3) 0.002(4)
 C(54) 0.024(4) 0.023(4) 0.014(4) -0.003(3) -0.002(3) 0.002(3)
 C(55) 0.041(5) 0.020(4) 0.014(5) -0.001(4) -0.010(4) 0.007(3)
 C(56) 0.017(4) 0.023(4) 0.024(5) -0.002(3) -0.001(3) 0.007(3)
 C(57) 0.037(5) 0.022(5) 0.027(5) -0.005(4) -0.000(4) -0.001(4)
 C(58) 0.063(6) 0.045(6) 0.011(4) -0.004(5) -0.014(5) 0.004(5)
 C(59) 0.019(4) 0.022(4) 0.022(5) 0.004(3) 0.002(3) 0.005(3)
 C(60) 0.022(4) 0.025(4) 0.023(5) -0.006(3) -0.008(3) -0.003(3)
 C(61) 0.028(4) 0.022(4) 0.013(4) -0.003(3) 0.000(3) -0.004(3)
 C(62) 0.038(5) 0.023(5) 0.020(4) -0.003(4) -0.005(4) -0.002(4)
 C(63) 0.053(6) 0.028(5) 0.029(6) 0.010(4) -0.004(5) -0.004(4)
 C(64) 0.031(5) 0.032(5) 0.035(6) 0.005(4) -0.008(4) -0.019(4)
 C(65) 0.024(5) 0.038(6) 0.039(6) 0.003(4) -0.000(4) -0.002(5)
 C(66) 0.021(4) 0.031(5) 0.014(4) 0.003(3) 0.001(3) -0.000(3)
 C(67) 0.015(3) 0.023(4) 0.014(4) -0.005(3) -0.001(3) -0.002(3)
 C(68) 0.043(6) 0.039(6) 0.011(4) 0.012(4) 0.005(4) 0.003(4)
 C(69) 0.053(6) 0.043(6) 0.010(4) -0.005(5) 0.008(4) 0.000(4)
 C(70) 0.023(4) 0.050(6) 0.019(5) -0.004(4) 0.003(4) -0.012(4)
 C(71) 0.042(6) 0.030(5) 0.025(5) 0.001(4) 0.008(4) -0.008(4)
 C(72) 0.017(4) 0.028(5) 0.027(5) -0.008(3) -0.002(3) 0.001(4)
 C(73) 0.015(4) 0.031(5) 0.013(4) 0.001(3) 0.001(3) -0.001(3)
 C(74) 0.026(5) 0.040(6) 0.017(4) -0.011(4) -0.004(4) 0.002(4)
 C(75) 0.014(4) 0.041(6) 0.021(5) -0.005(4) 0.001(4) 0.006(4)
 C(76) 0.023(5) 0.057(7) 0.035(6) 0.007(5) -0.003(4) -0.000(5)
 C(77) 0.024(5) 0.023(5) 0.056(7) 0.006(4) -0.005(5) -0.004(5)
 C(78) 0.025(4) 0.035(5) 0.022(5) -0.004(4) -0.007(4) 0.002(4)
 C(79) 0.007(3) 0.038(5) 0.010(4) -0.001(3) 0.001(3) 0.004(4)
 C(80) 0.046(6) 0.042(6) 0.017(5) -0.005(5) 0.001(4) 0.008(4)
 C(81) 0.048(6) 0.052(7) 0.015(5) -0.012(5) -0.004(4) 0.003(5)
 C(82) 0.033(5) 0.071(8) 0.006(4) -0.010(5) 0.008(3) -0.008(4)
 C(83) 0.032(5) 0.042(6) 0.024(5) 0.000(4) -0.001(4) -0.008(4)
 C(84) 0.030(5) 0.034(6) 0.018(5) -0.002(4) -0.003(4) -0.012(4)
 B(1) 0.020(5) 0.025(5) 0.016(5) 0.011(4) -0.001(4) 0.003(4)
 B(2) 0.015(4) 0.028(5) 0.012(4) 0.002(4) 0.000(3) 0.004(4)
 B(3) 0.016(4) 0.013(4) 0.024(5) -0.002(3) -0.003(4) -0.002(3)
 B(4) 0.011(4) 0.032(5) 0.011(4) 0.005(3) 0.005(3) 0.010(4)

#==============================================================================

_computing_data_collection            'CrystalClear'
_computing_cell_refinement            'CrystalClear'
_computing_data_reduction             'CrystalStructure'
_computing_structure_solution         'SIR92'
_computing_structure_refinement       'CRYSTALS'
_computing_publication_material       'CrystalStructure 3.7.0'
_computing_molecular_graphics          ?

#==============================================================================

# MOLECULAR GEOMETRY

_geom_special_details
;
    ENTER SPECIAL DETAILS OF THE MOLECULAR GEOMETRY
;

loop_
_geom_bond_atom_site_label_1
_geom_bond_atom_site_label_2
_geom_bond_distance
_geom_bond_publ_flag
_geom_bond_site_symmetry_1
_geom_bond_site_symmetry_2
Pt(1) P(1) 2.209(2) yes . .
Pt(1) P(2) 2.213(2) yes . .
Pt(1) O(1) 2.026(6) yes . .
Pt(1) O(2) 2.031(6) yes . .
Pt(2) P(3) 2.210(2) no . .
Pt(2) P(4) 2.231(2) no . .
Pt(2) O(6) 2.051(6) no . .
Pt(2) O(7) 2.054(6) no . .
P(1) C(17) 1.828(9) no . .
P(1) C(19) 1.805(8) no . .
P(1) C(25) 1.814(10) no . .
P(2) C(18) 1.809(9) no . .
P(2) C(31) 1.806(10) no . .
P(2) C(37) 1.818(9) no . .
P(3) C(59) 1.822(9) no . .
P(3) C(61) 1.821(9) no . .
P(3) C(67) 1.815(9) no . .
P(4) C(60) 1.812(9) no . .
P(4) C(73) 1.817(9) no . .
P(4) C(79) 1.823(9) no . .
O(1) B(1) 1.342(12) yes . .
O(2) B(2) 1.327(12) yes . .
O(3) B(1) 1.369(12) yes . .
O(3) B(2) 1.396(12) yes . .
O(4) C(7) 1.208(12) no . .
O(5) C(15) 1.202(14) no . .
O(6) B(3) 1.332(11) yes . .
O(7) B(4) 1.295(11) yes . .
O(8) B(3) 1.375(13) yes . .
O(8) B(4) 1.411(11) yes . .
O(9) C(49) 1.206(16) no . .
O(10) C(57) 1.228(12) no . .
C(1) C(2) 1.362(13) no . .
C(1) C(6) 1.410(14) no . .
C(1) B(1) 1.600(14) no . .
C(2) C(3) 1.399(15) no . .
C(3) C(4) 1.392(15) no . .
C(4) C(5) 1.391(14) no . .
C(4) C(7) 1.497(15) no . .
C(5) C(6) 1.371(15) no . .
C(7) C(8) 1.503(16) no . .
C(9) C(10) 1.403(14) no . .
C(9) C(14) 1.405(13) no . .
C(9) B(2) 1.563(14) no . .
C(10) C(11) 1.385(14) no . .
C(11) C(12) 1.393(14) no . .
C(12) C(13) 1.395(16) no . .
C(12) C(15) 1.502(15) no . .
C(13) C(14) 1.375(15) no . .
C(15) C(16) 1.496(17) no . .
C(17) C(18) 1.536(13) no . .
C(19) C(20) 1.391(13) no . .
C(19) C(24) 1.424(13) no . .
C(20) C(21) 1.379(13) no . .
C(21) C(22) 1.377(15) no . .
C(22) C(23) 1.366(16) no . .
C(23) C(24) 1.394(14) no . .
C(25) C(26) 1.395(15) no . .
C(25) C(30) 1.397(15) no . .
C(26) C(27) 1.372(16) no . .
C(27) C(28) 1.349(16) no . .
C(28) C(29) 1.354(16) no . .
C(29) C(30) 1.389(16) no . .
C(31) C(32) 1.403(15) no . .
C(31) C(36) 1.384(15) no . .
C(32) C(33) 1.379(18) no . .
C(33) C(34) 1.405(19) no . .
C(34) C(35) 1.330(18) no . .
C(35) C(36) 1.402(17) no . .
C(37) C(38) 1.412(13) no . .
C(37) C(42) 1.383(13) no . .
C(38) C(39) 1.371(13) no . .
C(39) C(40) 1.366(14) no . .
C(40) C(41) 1.388(15) no . .
C(41) C(42) 1.402(14) no . .
C(43) C(44) 1.372(14) no . .
C(43) C(48) 1.417(13) no . .
C(43) B(3) 1.613(14) no . .
C(44) C(45) 1.405(13) no . .
C(45) C(46) 1.411(14) no . .
C(46) C(47) 1.377(14) no . .
C(46) C(49) 1.501(15) no . .
C(47) C(48) 1.384(14) no . .
C(49) C(50) 1.500(18) no . .
C(51) C(52) 1.420(12) no . .
C(51) C(56) 1.392(13) no . .
C(51) B(4) 1.596(14) no . .
C(52) C(53) 1.394(13) no . .
C(53) C(54) 1.397(13) no . .
C(54) C(55) 1.384(14) no . .
C(54) C(57) 1.490(14) no . .
C(55) C(56) 1.398(13) no . .
C(57) C(58) 1.494(16) no . .
C(59) C(60) 1.523(13) no . .
C(61) C(62) 1.376(13) no . .
C(61) C(66) 1.387(12) no . .
C(62) C(63) 1.392(14) no . .
C(63) C(64) 1.371(15) no . .
C(64) C(65) 1.360(15) no . .
C(65) C(66) 1.409(14) no . .
C(67) C(68) 1.378(13) no . .
C(67) C(72) 1.385(13) no . .
C(68) C(69) 1.374(14) no . .
C(69) C(70) 1.379(16) no . .
C(70) C(71) 1.402(15) no . .
C(71) C(72) 1.378(14) no . .
C(73) C(74) 1.382(13) no . .
C(73) C(78) 1.406(14) no . .
C(74) C(75) 1.405(14) no . .
C(75) C(76) 1.376(17) no . .
C(76) C(77) 1.374(15) no . .
C(77) C(78) 1.388(14) no . .
C(79) C(80) 1.396(15) no . .
C(79) C(84) 1.387(15) no . .
C(80) C(81) 1.410(15) no . .
C(81) C(82) 1.396(18) no . .
C(82) C(83) 1.375(16) no . .
C(83) C(84) 1.392(15) no . .
C(2) H(1) 0.950 no . .
C(3) H(2) 0.950 no . .
C(5) H(3) 0.950 no . .
C(6) H(4) 0.950 no . .
C(8) H(5) 0.950 no . .
C(8) H(6) 0.950 no . .
C(8) H(7) 0.950 no . .
C(10) H(8) 0.950 no . .
C(11) H(9) 0.950 no . .
C(13) H(10) 0.950 no . .
C(14) H(11) 0.950 no . .
C(16) H(12) 0.950 no . .
C(16) H(13) 0.950 no . .
C(16) H(14) 0.950 no . .
C(17) H(15) 0.950 no . .
C(17) H(16) 0.950 no . .
C(18) H(17) 0.950 no . .
C(18) H(18) 0.950 no . .
C(20) H(19) 0.950 no . .
C(21) H(20) 0.950 no . .
C(22) H(21) 0.950 no . .
C(23) H(22) 0.950 no . .
C(24) H(23) 0.950 no . .
C(26) H(24) 0.950 no . .
C(27) H(25) 0.950 no . .
C(28) H(26) 0.950 no . .
C(29) H(27) 0.950 no . .
C(30) H(28) 0.950 no . .
C(32) H(29) 0.950 no . .
C(33) H(30) 0.950 no . .
C(34) H(31) 0.950 no . .
C(35) H(32) 0.950 no . .
C(36) H(33) 0.950 no . .
C(38) H(34) 0.950 no . .
C(39) H(35) 0.950 no . .
C(40) H(36) 0.950 no . .
C(41) H(37) 0.950 no . .
C(42) H(38) 0.950 no . .
C(44) H(39) 0.950 no . .
C(45) H(40) 0.950 no . .
C(47) H(41) 0.950 no . .
C(48) H(42) 0.950 no . .
C(50) H(43) 0.950 no . .
C(50) H(44) 0.950 no . .
C(50) H(45) 0.950 no . .
C(52) H(46) 0.950 no . .
C(53) H(47) 0.950 no . .
C(55) H(48) 0.950 no . .
C(56) H(49) 0.950 no . .
C(58) H(50) 0.950 no . .
C(58) H(51) 0.950 no . .
C(58) H(52) 0.950 no . .
C(59) H(53) 0.950 no . .
C(59) H(54) 0.950 no . .
C(60) H(55) 0.950 no . .
C(60) H(56) 0.950 no . .
C(62) H(57) 0.950 no . .
C(63) H(58) 0.950 no . .
C(64) H(59) 0.950 no . .
C(65) H(60) 0.950 no . .
C(66) H(61) 0.950 no . .
C(68) H(62) 0.950 no . .
C(69) H(63) 0.950 no . .
C(70) H(64) 0.950 no . .
C(71) H(65) 0.950 no . .
C(72) H(66) 0.950 no . .
C(74) H(67) 0.950 no . .
C(75) H(68) 0.950 no . .
C(76) H(69) 0.950 no . .
C(77) H(70) 0.950 no . .
C(78) H(71) 0.950 no . .
C(80) H(72) 0.950 no . .
C(81) H(73) 0.950 no . .
C(82) H(74) 0.950 no . .
C(83) H(75) 0.950 no . .
C(84) H(76) 0.950 no . .

loop_
_geom_angle_atom_site_label_1
_geom_angle_atom_site_label_2
_geom_angle_atom_site_label_3
_geom_angle
_geom_angle_publ_flag
_geom_angle_site_symmetry_1
_geom_angle_site_symmetry_2
_geom_angle_site_symmetry_3
P(1) Pt(1) P(2) 86.56(9) no . . .
P(1) Pt(1) O(1) 93.7(2) no . . .
P(1) Pt(1) O(2) 174.8(2) no . . .
P(2) Pt(1) O(1) 178.3(2) no . . .
P(2) Pt(1) O(2) 88.3(2) no . . .
O(1) Pt(1) O(2) 91.4(2) yes . . .
P(3) Pt(2) P(4) 86.32(9) no . . .
P(3) Pt(2) O(6) 90.72(19) no . . .
P(3) Pt(2) O(7) 178.55(19) no . . .
P(4) Pt(2) O(6) 176.81(19) no . . .
P(4) Pt(2) O(7) 92.98(19) no . . .
O(6) Pt(2) O(7) 90.0(2) yes . . .
Pt(1) P(1) C(17) 108.0(3) no . . .
Pt(1) P(1) C(19) 113.7(3) no . . .
Pt(1) P(1) C(25) 115.2(3) no . . .
C(17) P(1) C(19) 105.6(4) no . . .
C(17) P(1) C(25) 108.0(4) no . . .
C(19) P(1) C(25) 105.8(4) no . . .
Pt(1) P(2) C(18) 108.0(3) no . . .
Pt(1) P(2) C(31) 114.5(3) no . . .
Pt(1) P(2) C(37) 116.4(3) no . . .
C(18) P(2) C(31) 104.8(4) no . . .
C(18) P(2) C(37) 105.8(4) no . . .
C(31) P(2) C(37) 106.4(4) no . . .
Pt(2) P(3) C(59) 107.8(3) no . . .
Pt(2) P(3) C(61) 113.2(3) no . . .
Pt(2) P(3) C(67) 117.3(3) no . . .
C(59) P(3) C(61) 107.1(4) no . . .
C(59) P(3) C(67) 104.4(4) no . . .
C(61) P(3) C(67) 106.5(4) no . . .
Pt(2) P(4) C(60) 107.9(3) no . . .
Pt(2) P(4) C(73) 113.6(3) no . . .
Pt(2) P(4) C(79) 117.3(2) no . . .
C(60) P(4) C(73) 106.9(4) no . . .
C(60) P(4) C(79) 106.3(4) no . . .
C(73) P(4) C(79) 104.1(4) no . . .
Pt(1) O(1) B(1) 124.2(6) yes . . .
Pt(1) O(2) B(2) 125.3(6) yes . . .
B(1) O(3) B(2) 126.5(7) yes . . .
Pt(2) O(6) B(3) 122.6(6) yes . . .
Pt(2) O(7) B(4) 124.2(6) yes . . .
B(3) O(8) B(4) 124.0(7) yes . . .
C(2) C(1) C(6) 116.3(9) no . . .
C(2) C(1) B(1) 123.6(8) no . . .
C(6) C(1) B(1) 120.1(8) no . . .
C(1) C(2) C(3) 122.4(9) no . . .
C(2) C(3) C(4) 120.4(9) no . . .
C(3) C(4) C(5) 117.9(9) no . . .
C(3) C(4) C(7) 118.7(8) no . . .
C(5) C(4) C(7) 123.4(9) no . . .
C(4) C(5) C(6) 120.5(10) no . . .
C(1) C(6) C(5) 122.4(9) no . . .
O(4) C(7) C(4) 121.4(9) no . . .
O(4) C(7) C(8) 120.7(10) no . . .
C(4) C(7) C(8) 117.8(9) no . . .
C(10) C(9) C(14) 116.7(8) no . . .
C(10) C(9) B(2) 119.6(8) no . . .
C(14) C(9) B(2) 123.6(8) no . . .
C(9) C(10) C(11) 122.3(9) no . . .
C(10) C(11) C(12) 119.9(10) no . . .
C(11) C(12) C(13) 118.3(9) no . . .
C(11) C(12) C(15) 121.9(9) no . . .
C(13) C(12) C(15) 119.8(9) no . . .
C(12) C(13) C(14) 121.6(8) no . . .
C(9) C(14) C(13) 121.0(9) no . . .
O(5) C(15) C(12) 120.8(10) no . . .
O(5) C(15) C(16) 119.8(11) no . . .
C(12) C(15) C(16) 119.4(9) no . . .
P(1) C(17) C(18) 107.0(6) no . . .
P(2) C(18) C(17) 108.9(6) no . . .
P(1) C(19) C(20) 120.5(6) no . . .
P(1) C(19) C(24) 121.1(7) no . . .
C(20) C(19) C(24) 118.4(8) no . . .
C(19) C(20) C(21) 120.3(8) no . . .
C(20) C(21) C(22) 120.9(9) no . . .
C(21) C(22) C(23) 120.3(10) no . . .
C(22) C(23) C(24) 120.3(9) no . . .
C(19) C(24) C(23) 119.6(9) no . . .
P(1) C(25) C(26) 124.3(8) no . . .
P(1) C(25) C(30) 116.7(7) no . . .
C(26) C(25) C(30) 118.7(9) no . . .
C(25) C(26) C(27) 120.5(10) no . . .
C(26) C(27) C(28) 120.3(10) no . . .
C(27) C(28) C(29) 120.6(11) no . . .
C(28) C(29) C(30) 121.2(11) no . . .
C(25) C(30) C(29) 118.6(10) no . . .
P(2) C(31) C(32) 118.4(7) no . . .
P(2) C(31) C(36) 123.4(8) no . . .
C(32) C(31) C(36) 118.2(10) no . . .
C(31) C(32) C(33) 120.9(10) no . . .
C(32) C(33) C(34) 120.0(12) no . . .
C(33) C(34) C(35) 118.8(12) no . . .
C(34) C(35) C(36) 122.8(12) no . . .
C(31) C(36) C(35) 119.3(11) no . . .
P(2) C(37) C(38) 120.8(6) no . . .
P(2) C(37) C(42) 120.0(7) no . . .
C(38) C(37) C(42) 119.2(8) no . . .
C(37) C(38) C(39) 120.7(8) no . . .
C(38) C(39) C(40) 120.2(9) no . . .
C(39) C(40) C(41) 120.5(9) no . . .
C(40) C(41) C(42) 120.2(9) no . . .
C(37) C(42) C(41) 119.4(9) no . . .
C(44) C(43) C(48) 116.9(8) no . . .
C(44) C(43) B(3) 122.0(7) no . . .
C(48) C(43) B(3) 121.1(8) no . . .
C(43) C(44) C(45) 123.6(8) no . . .
C(44) C(45) C(46) 118.1(8) no . . .
C(45) C(46) C(47) 119.0(9) no . . .
C(45) C(46) C(49) 121.7(9) no . . .
C(47) C(46) C(49) 119.3(9) no . . .
C(46) C(47) C(48) 121.9(9) no . . .
C(43) C(48) C(47) 120.5(9) no . . .
O(9) C(49) C(46) 118.9(11) no . . .
O(9) C(49) C(50) 122.5(11) no . . .
C(46) C(49) C(50) 118.5(9) no . . .
C(52) C(51) C(56) 117.1(8) no . . .
C(52) C(51) B(4) 121.8(8) no . . .
C(56) C(51) B(4) 121.0(7) no . . .
C(51) C(52) C(53) 119.6(8) no . . .
C(52) C(53) C(54) 122.4(8) no . . .
C(53) C(54) C(55) 118.1(8) no . . .
C(53) C(54) C(57) 118.7(8) no . . .
C(55) C(54) C(57) 123.1(8) no . . .
C(54) C(55) C(56) 120.0(9) no . . .
C(51) C(56) C(55) 122.7(8) no . . .
O(10) C(57) C(54) 121.1(9) no . . .
O(10) C(57) C(58) 119.5(10) no . . .
C(54) C(57) C(58) 119.4(8) no . . .
P(3) C(59) C(60) 108.7(6) no . . .
P(4) C(60) C(59) 107.8(6) no . . .
P(3) C(61) C(62) 123.0(7) no . . .
P(3) C(61) C(66) 117.1(7) no . . .
C(62) C(61) C(66) 119.7(8) no . . .
C(61) C(62) C(63) 120.5(9) no . . .
C(62) C(63) C(64) 120.2(9) no . . .
C(63) C(64) C(65) 119.7(9) no . . .
C(64) C(65) C(66) 121.2(9) no . . .
C(61) C(66) C(65) 118.7(9) no . . .
P(3) C(67) C(68) 121.4(7) no . . .
P(3) C(67) C(72) 118.8(7) no . . .
C(68) C(67) C(72) 119.4(8) no . . .
C(67) C(68) C(69) 122.2(10) no . . .
C(68) C(69) C(70) 118.5(9) no . . .
C(69) C(70) C(71) 120.2(9) no . . .
C(70) C(71) C(72) 120.2(9) no . . .
C(67) C(72) C(71) 119.5(9) no . . .
P(4) C(73) C(74) 121.4(7) no . . .
P(4) C(73) C(78) 119.4(6) no . . .
C(74) C(73) C(78) 119.1(8) no . . .
C(73) C(74) C(75) 120.4(10) no . . .
C(74) C(75) C(76) 119.2(9) no . . .
C(75) C(76) C(77) 121.2(10) no . . .
C(76) C(77) C(78) 119.8(10) no . . .
C(73) C(78) C(77) 120.2(8) no . . .
P(4) C(79) C(80) 116.5(7) no . . .
P(4) C(79) C(84) 122.8(7) no . . .
C(80) C(79) C(84) 120.8(9) no . . .
C(79) C(80) C(81) 118.6(10) no . . .
C(80) C(81) C(82) 120.3(10) no . . .
C(81) C(82) C(83) 120.0(10) no . . .
C(82) C(83) C(84) 120.6(10) no . . .
C(79) C(84) C(83) 119.8(10) no . . .
O(1) B(1) O(3) 126.8(9) yes . . .
O(1) B(1) C(1) 117.3(8) no . . .
O(3) B(1) C(1) 115.8(8) no . . .
O(2) B(2) O(3) 125.4(8) yes . . .
O(2) B(2) C(9) 117.2(8) no . . .
O(3) B(2) C(9) 117.4(8) no . . .
O(6) B(3) O(8) 128.0(9) yes . . .
O(6) B(3) C(43) 115.2(8) no . . .
O(8) B(3) C(43) 116.8(7) no . . .
O(7) B(4) O(8) 126.9(8) yes . . .
O(7) B(4) C(51) 119.0(8) no . . .
O(8) B(4) C(51) 114.1(7) no . . .
C(1) C(2) H(1) 119.1 no . . .
C(3) C(2) H(1) 118.5 no . . .
C(2) C(3) H(2) 120.6 no . . .
C(4) C(3) H(2) 119.0 no . . .
C(4) C(5) H(3) 118.0 no . . .
C(6) C(5) H(3) 121.5 no . . .
C(1) C(6) H(4) 119.5 no . . .
C(5) C(6) H(4) 118.0 no . . .
C(7) C(8) H(5) 111.9 no . . .
C(7) C(8) H(6) 107.8 no . . .
C(7) C(8) H(7) 108.8 no . . .
H(5) C(8) H(6) 109.5 no . . .
H(5) C(8) H(7) 109.5 no . . .
H(6) C(8) H(7) 109.5 no . . .
C(9) C(10) H(8) 117.1 no . . .
C(11) C(10) H(8) 120.6 no . . .
C(10) C(11) H(9) 119.2 no . . .
C(12) C(11) H(9) 120.8 no . . .
C(12) C(13) H(10) 120.2 no . . .
C(14) C(13) H(10) 118.1 no . . .
C(9) C(14) H(11) 117.5 no . . .
C(13) C(14) H(11) 121.5 no . . .
C(15) C(16) H(12) 110.4 no . . .
C(15) C(16) H(13) 107.1 no . . .
C(15) C(16) H(14) 110.8 no . . .
H(12) C(16) H(13) 109.5 no . . .
H(12) C(16) H(14) 109.5 no . . .
H(13) C(16) H(14) 109.5 no . . .
P(1) C(17) H(15) 109.5 no . . .
P(1) C(17) H(16) 110.3 no . . .
C(18) C(17) H(15) 111.3 no . . .
C(18) C(17) H(16) 109.3 no . . .
H(15) C(17) H(16) 109.5 no . . .
P(2) C(18) H(17) 110.1 no . . .
P(2) C(18) H(18) 109.4 no . . .
C(17) C(18) H(17) 110.0 no . . .
C(17) C(18) H(18) 109.0 no . . .
H(17) C(18) H(18) 109.5 no . . .
C(19) C(20) H(19) 119.7 no . . .
C(21) C(20) H(19) 119.9 no . . .
C(20) C(21) H(20) 120.3 no . . .
C(22) C(21) H(20) 118.7 no . . .
C(21) C(22) H(21) 119.7 no . . .
C(23) C(22) H(21) 119.9 no . . .
C(22) C(23) H(22) 119.1 no . . .
C(24) C(23) H(22) 120.6 no . . .
C(19) C(24) H(23) 119.1 no . . .
C(23) C(24) H(23) 121.2 no . . .
C(25) C(26) H(24) 118.4 no . . .
C(27) C(26) H(24) 121.1 no . . .
C(26) C(27) H(25) 119.5 no . . .
C(28) C(27) H(25) 120.2 no . . .
C(27) C(28) H(26) 119.5 no . . .
C(29) C(28) H(26) 119.8 no . . .
C(28) C(29) H(27) 120.3 no . . .
C(30) C(29) H(27) 118.5 no . . .
C(25) C(30) H(28) 119.0 no . . .
C(29) C(30) H(28) 122.5 no . . .
C(31) C(32) H(29) 120.0 no . . .
C(33) C(32) H(29) 119.1 no . . .
C(32) C(33) H(30) 119.5 no . . .
C(34) C(33) H(30) 120.5 no . . .
C(33) C(34) H(31) 122.2 no . . .
C(35) C(34) H(31) 119.0 no . . .
C(34) C(35) H(32) 120.0 no . . .
C(36) C(35) H(32) 117.1 no . . .
C(31) C(36) H(33) 120.9 no . . .
C(35) C(36) H(33) 119.8 no . . .
C(37) C(38) H(34) 119.8 no . . .
C(39) C(38) H(34) 119.5 no . . .
C(38) C(39) H(35) 119.0 no . . .
C(40) C(39) H(35) 120.8 no . . .
C(39) C(40) H(36) 117.5 no . . .
C(41) C(40) H(36) 121.8 no . . .
C(40) C(41) H(37) 118.7 no . . .
C(42) C(41) H(37) 121.1 no . . .
C(37) C(42) H(38) 120.1 no . . .
C(41) C(42) H(38) 120.5 no . . .
C(43) C(44) H(39) 118.4 no . . .
C(45) C(44) H(39) 117.8 no . . .
C(44) C(45) H(40) 122.3 no . . .
C(46) C(45) H(40) 119.6 no . . .
C(46) C(47) H(41) 118.2 no . . .
C(48) C(47) H(41) 119.9 no . . .
C(43) C(48) H(42) 119.5 no . . .
C(47) C(48) H(42) 119.9 no . . .
C(49) C(50) H(43) 109.8 no . . .
C(49) C(50) H(44) 108.7 no . . .
C(49) C(50) H(45) 110.0 no . . .
H(43) C(50) H(44) 109.5 no . . .
H(43) C(50) H(45) 109.5 no . . .
H(44) C(50) H(45) 109.5 no . . .
C(51) C(52) H(46) 119.7 no . . .
C(53) C(52) H(46) 120.8 no . . .
C(52) C(53) H(47) 118.8 no . . .
C(54) C(53) H(47) 118.8 no . . .
C(54) C(55) H(48) 119.7 no . . .
C(56) C(55) H(48) 120.2 no . . .
C(51) C(56) H(49) 117.4 no . . .
C(55) C(56) H(49) 119.9 no . . .
C(57) C(58) H(50) 108.3 no . . .
C(57) C(58) H(51) 110.3 no . . .
C(57) C(58) H(52) 109.9 no . . .
H(50) C(58) H(51) 109.5 no . . .
H(50) C(58) H(52) 109.5 no . . .
H(51) C(58) H(52) 109.5 no . . .
P(3) C(59) H(53) 109.7 no . . .
P(3) C(59) H(54) 109.1 no . . .
C(60) C(59) H(53) 109.6 no . . .
C(60) C(59) H(54) 110.2 no . . .
H(53) C(59) H(54) 109.5 no . . .
P(4) C(60) H(55) 110.4 no . . .
P(4) C(60) H(56) 109.6 no . . .
C(59) C(60) H(55) 109.4 no . . .
C(59) C(60) H(56) 110.1 no . . .
H(55) C(60) H(56) 109.5 no . . .
C(61) C(62) H(57) 119.9 no . . .
C(63) C(62) H(57) 119.6 no . . .
C(62) C(63) H(58) 120.2 no . . .
C(64) C(63) H(58) 119.6 no . . .
C(63) C(64) H(59) 119.2 no . . .
C(65) C(64) H(59) 121.1 no . . .
C(64) C(65) H(60) 118.4 no . . .
C(66) C(65) H(60) 120.3 no . . .
C(61) C(66) H(61) 120.3 no . . .
C(65) C(66) H(61) 121.0 no . . .
C(67) C(68) H(62) 119.0 no . . .
C(69) C(68) H(62) 118.7 no . . .
C(68) C(69) H(63) 121.4 no . . .
C(70) C(69) H(63) 120.0 no . . .
C(69) C(70) H(64) 118.4 no . . .
C(71) C(70) H(64) 121.4 no . . .
C(70) C(71) H(65) 119.3 no . . .
C(72) C(71) H(65) 120.5 no . . .
C(67) C(72) H(66) 119.8 no . . .
C(71) C(72) H(66) 120.7 no . . .
C(73) C(74) H(67) 119.6 no . . .
C(75) C(74) H(67) 120.0 no . . .
C(74) C(75) H(68) 120.0 no . . .
C(76) C(75) H(68) 120.7 no . . .
C(75) C(76) H(69) 118.6 no . . .
C(77) C(76) H(69) 120.1 no . . .
C(76) C(77) H(70) 120.0 no . . .
C(78) C(77) H(70) 120.3 no . . .
C(73) C(78) H(71) 119.1 no . . .
C(77) C(78) H(71) 120.7 no . . .
C(79) C(80) H(72) 121.8 no . . .
C(81) C(80) H(72) 119.6 no . . .
C(80) C(81) H(73) 120.9 no . . .
C(82) C(81) H(73) 118.8 no . . .
C(81) C(82) H(74) 120.6 no . . .
C(83) C(82) H(74) 119.5 no . . .
C(82) C(83) H(75) 119.5 no . . .
C(84) C(83) H(75) 119.9 no . . .
C(79) C(84) H(76) 119.7 no . . .
C(83) C(84) H(76) 120.4 no . . .

data_form3

# CHEMICAL DATA

_chemical_formula_sum                  'C64 H56 F12 O9 P4 Pt2 '
_chemical_formula_moiety               'C64 H56 F12 O9 P4 Pt2 '
_chemical_formula_weight               1711.20
_chemical_melting_point                ?

#==============================================================================

# CRYSTAL DATA
_symmetry_cell_setting                 monoclinic
_symmetry_space_group_name_H-M        'P 1 21/c 1'
_symmetry_space_group_name_Hall       '-P 2ybc'
_symmetry_Int_Tables_number            14
loop_
_symmetry_equiv_pos_site_id
_symmetry_equiv_pos_as_xyz
1   '+X,+Y,+Z'
2   '-X,1/2+Y,1/2-Z'
3   '-X,-Y,-Z'
4   '+X,1/2-Y,1/2+Z'

#------------------------------------------------------------------------------

_cell_length_a                         14.9162(16)
_cell_length_b                         18.975(2)
_cell_length_c                         22.898(3)
_cell_angle_alpha                      90.0000
_cell_angle_beta                       93.4409(15)
_cell_angle_gamma                      90.0000
_cell_volume                           6469.0(12)
_cell_formula_units_Z                  4
_cell_measurement_reflns_used          16517
_cell_measurement_theta_min            3.0
_cell_measurement_theta_max            27.5
_cell_measurement_temperature          113.1

#------------------------------------------------------------------------------

_exptl_crystal_description            'prism'
_exptl_crystal_colour                 'colorless'
_exptl_crystal_size_max                0.30
_exptl_crystal_size_mid                0.30
_exptl_crystal_size_min                0.20
_exptl_crystal_density_diffrn          1.757
_exptl_crystal_density_meas            ?
_exptl_crystal_density_method         'not measured'
_exptl_crystal_F_000                   3344.00
_exptl_absorpt_coefficient_mu          4.492
_exptl_absorpt_correction_type         none
_exptl_absorpt_correction_T_min        0.000
_exptl_absorpt_correction_T_max        0.000

#==============================================================================

# EXPERIMENTAL DATA

_diffrn_radiation_type                'Mo K\a'
_diffrn_radiation_wavelength           0.71070
_diffrn_measurement_device_type       'Rigaku Saturn'
_diffrn_measurement_method             \w
_diffrn_detector_area_resol_mean       7.31
_diffrn_reflns_number                  47277
_diffrn_reflns_av_R_equivalents        0.066
_diffrn_reflns_theta_max               27.48
_diffrn_measured_fraction_theta_max    0.979
_diffrn_reflns_theta_full              27.48
_diffrn_measured_fraction_theta_full   0.979
_diffrn_reflns_limit_h_min             -18
_diffrn_reflns_limit_h_max             19
_diffrn_reflns_limit_k_min             -24
_diffrn_reflns_limit_k_max             24
_diffrn_reflns_limit_l_min             -29
_diffrn_reflns_limit_l_max             22

#==============================================================================

# REFINEMENT DATA

_refine_special_details
;
    Refinement using reflections with F^2^ > 2.0 sigma(F^2^).
    The weighted R-factor(wR), goodness of fit (S) and R-factor (gt) are 
    based on F, with F set to zero for negative F. The threshold expression of
    F^2^ > 2.0 sigma(F^2^) is used only for calculating R-factor (gt).
;
_reflns_number_total                   14530
_reflns_number_gt                      10533
_reflns_threshold_expression           F^2^>2.0\s(F^2^)
_refine_ls_structure_factor_coef       F
_refine_ls_R_factor_gt                 0.0400
_refine_ls_wR_factor_ref               0.0457
_refine_ls_hydrogen_treatment          refall
_refine_ls_number_reflns               10643
_refine_ls_number_parameters           876
_refine_ls_goodness_of_fit_ref         0.915
_refine_ls_weighting_scheme            calc
_refine_ls_weighting_details
'w = 1/[1.0000\s(Fo^2^)]'
_refine_ls_shift/su_max                0.0030
_refine_diff_density_max               1.93
_refine_diff_density_min               -1.13
_refine_ls_extinction_method           none
_refine_ls_extinction_coef             ?

loop_
_atom_type_symbol
_atom_type_description
_atom_type_scat_dispersion_real
_atom_type_scat_dispersion_imag
_atom_type_scat_source
  'C' 'C'  0.003 0.002 
;
International Tables for Crystallography
(1992, Vol. C, Tables 4.2.6.8 and 6.1.1.4)
;
  'H' 'H'  0.000 0.000 
;
International Tables for Crystallography
(1992, Vol. C, Table 6.1.1.4)
;
  'O' 'O'  0.011 0.006 
;
International Tables for Crystallography
(1992, Vol. C, Tables 4.2.6.8 and 6.1.1.4)
;
  'F' 'F'  0.017 0.010 
;
International Tables for Crystallography
(1992, Vol. C, Tables 4.2.6.8 and 6.1.1.4)
;
  'P' 'P'  0.102 0.094 
;
International Tables for Crystallography
(1992, Vol. C, Tables 4.2.6.8 and 6.1.1.4)
;
  'Pt' 'Pt'  -1.703 8.390 
;
International Tables for Crystallography
(1992, Vol. C, Tables 4.2.6.8 and 6.1.1.4)
;

#==============================================================================

# ATOMIC COORDINATES AND THERMAL PARAMETERS

loop_
_atom_site_label
_atom_site_type_symbol
_atom_site_fract_x
_atom_site_fract_y
_atom_site_fract_z
_atom_site_U_iso_or_equiv
_atom_site_adp_type
_atom_site_occupancy
_atom_site_symmetry_multiplicity
_atom_site_calc_flag
_atom_site_refinement_flags
_atom_site_disorder_assembly
_atom_site_disorder_group
 Pt(1) Pt 0.27535(2) 0.465680(10) 1.329960(10) 0.01869(6) Uani 1.00 1 d . . .
 Pt(2) Pt 0.213360(10) 0.394660(10) 1.030510(10) 0.01648(5) Uani 1.00 1 d . . .
 P(1) P 0.31427(11) 0.36258(9) 1.36975(6) 0.0203(4) Uani 1.00 1 d . . .
 P(2) P 0.14368(11) 0.45017(9) 1.36721(6) 0.0220(4) Uani 1.00 1 d . . .
 P(3) P 0.31715(11) 0.42889(9) 1.09770(6) 0.0213(4) Uani 1.00 1 d . . .
 P(4) P 0.13876(11) 0.35493(9) 1.10415(6) 0.0198(4) Uani 1.00 1 d . . .
 F(1) F 0.6125(3) 0.5338(4) 1.3045(2) 0.106(2) Uani 1.00 1 d . . .
 F(2) F 0.5144(3) 0.5678(2) 1.2420(2) 0.0633(17) Uani 1.00 1 d . . .
 F(3) F 0.5598(4) 0.4629(3) 1.2381(2) 0.083(2) Uani 1.00 1 d . . .
 F(4) F 0.1487(4) 0.6938(4) 1.2945(4) 0.126(3) Uani 1.00 1 d . . .
 F(5) F 0.2701(4) 0.7369(3) 1.2737(4) 0.135(3) Uani 1.00 1 d . . .
 F(6) F 0.1991(7) 0.6687(4) 1.2180(3) 0.138(3) Uani 1.00 1 d . . .
 F(7) F 0.3591(6) 0.4941(4) 0.8712(2) 0.140(3) Uani 1.00 1 d . . .
 F(8) F 0.2338(5) 0.4686(5) 0.8409(3) 0.143(3) Uani 1.00 1 d . . .
 F(9) F 0.3375(5) 0.4049(3) 0.8225(2) 0.106(2) Uani 1.00 1 d . . .
 F(10) F -0.0418(3) 0.3816(2) 0.8995(2) 0.0613(16) Uani 1.00 1 d . . .
 F(11) F 0.0498(3) 0.3204(3) 0.85249(19) 0.0649(17) Uani 1.00 1 d . . .
 F(12) F -0.0508(3) 0.2697(2) 0.8993(2) 0.0611(16) Uani 1.00 1 d . . .
 O(1) O 0.3917(2) 0.4811(2) 1.28604(18) 0.0232(11) Uani 1.00 1 d . . .
 O(2) O 0.4854(3) 0.4811(3) 1.3662(2) 0.0371(14) Uani 1.00 1 d . . .
 O(3) O 0.2296(2) 0.5592(2) 1.2896(2) 0.0283(12) Uani 1.00 1 d . . .
 O(4) O 0.3346(3) 0.6281(2) 1.3363(2) 0.0472(17) Uani 1.00 1 d . . .
 O(5) O 0.2764(2) 0.4424(2) 0.96147(18) 0.0209(11) Uani 1.00 1 d . . .
 O(6) O 0.2896(3) 0.3376(2) 0.9168(2) 0.0365(14) Uani 1.00 1 d . . .
 O(7) O 0.1122(2) 0.3780(2) 0.96534(18) 0.0212(11) Uani 1.00 1 d . . .
 O(8) O 0.0833(3) 0.2633(2) 0.9810(2) 0.0302(13) Uani 1.00 1 d . . .
 O(9) O 0.2672(6) 0.9563(5) 0.0833(4) 0.112(3) Uani 1.00 1 d . . .
 C(1) C 0.4661(4) 0.4897(3) 1.3147(2) 0.0247(16) Uani 1.00 1 d . . .
 C(2) C 0.5407(4) 0.5129(4) 1.2751(3) 0.036(2) Uani 1.00 1 d . . .
 C(3) C 0.2697(4) 0.6169(3) 1.3027(3) 0.033(2) Uani 1.00 1 d . . .
 C(4) C 0.2243(5) 0.6801(4) 1.2715(4) 0.044(2) Uani 1.00 1 d . . .
 C(5) C 0.2096(3) 0.3172(3) 1.3846(2) 0.0248(17) Uani 1.00 1 d . . .
 C(6) C 0.1504(4) 0.3716(3) 1.4136(2) 0.0261(17) Uani 1.00 1 d . . .
 C(7) C 0.3758(4) 0.3654(3) 1.4404(2) 0.0248(17) Uani 1.00 1 d . . .
 C(8) C 0.4036(4) 0.3024(4) 1.4664(3) 0.035(2) Uani 1.00 1 d . . .
 C(9) C 0.4494(5) 0.3024(4) 1.5215(3) 0.038(2) Uani 1.00 1 d . . .
 C(10) C 0.4651(4) 0.3649(4) 1.5500(3) 0.034(2) Uani 1.00 1 d . . .
 C(11) C 0.4366(4) 0.4282(4) 1.5252(2) 0.0293(18) Uani 1.00 1 d . . .
 C(12) C 0.3912(4) 0.4285(3) 1.4704(2) 0.0245(17) Uani 1.00 1 d . . .
 C(13) C 0.3789(4) 0.3076(3) 1.3233(2) 0.0227(16) Uani 1.00 1 d . . .
 C(14) C 0.3370(4) 0.2633(3) 1.2814(2) 0.0289(18) Uani 1.00 1 d . . .
 C(15) C 0.3877(5) 0.2251(4) 1.2444(2) 0.036(2) Uani 1.00 1 d . . .
 C(16) C 0.4797(5) 0.2310(4) 1.2473(3) 0.034(2) Uani 1.00 1 d . . .
 C(17) C 0.5221(4) 0.2742(3) 1.2883(3) 0.0311(19) Uani 1.00 1 d . . .
 C(18) C 0.4725(4) 0.3130(3) 1.3270(2) 0.0276(18) Uani 1.00 1 d . . .
 C(19) C 0.1054(4) 0.5234(3) 1.4088(2) 0.0255(17) Uani 1.00 1 d . . .
 C(20) C 0.0146(5) 0.5295(5) 1.4209(3) 0.046(2) Uani 1.00 1 d . . .
 C(21) C -0.0119(6) 0.5885(5) 1.4524(3) 0.052(2) Uani 1.00 1 d . . .
 C(22) C 0.0481(7) 0.6377(5) 1.4729(3) 0.057(2) Uani 1.00 1 d . . .
 C(23) C 0.1358(6) 0.6309(4) 1.4612(3) 0.050(2) Uani 1.00 1 d . . .
 C(24) C 0.1656(5) 0.5742(4) 1.4300(3) 0.037(2) Uani 1.00 1 d . . .
 C(25) C 0.0543(3) 0.4357(3) 1.3111(2) 0.0239(16) Uani 1.00 1 d . . .
 C(26) C 0.0108(4) 0.3711(4) 1.3044(3) 0.0321(19) Uani 1.00 1 d . . .
 C(27) C -0.0580(4) 0.3617(4) 1.2600(3) 0.040(2) Uani 1.00 1 d . . .
 C(28) C -0.0837(4) 0.4182(4) 1.2247(3) 0.038(2) Uani 1.00 1 d . . .
 C(29) C -0.0398(4) 0.4819(4) 1.2313(3) 0.037(2) Uani 1.00 1 d . . .
 C(30) C 0.0296(4) 0.4910(4) 1.2742(2) 0.0312(19) Uani 1.00 1 d . . .
 C(31) C 0.2902(4) 0.4011(3) 0.9184(2) 0.0256(17) Uani 1.00 1 d . . .
 C(32) C 0.3068(4) 0.4424(4) 0.8627(3) 0.033(2) Uani 1.00 1 d . . .
 C(33) C 0.0727(3) 0.3189(3) 0.9559(2) 0.0221(16) Uani 1.00 1 d . . .
 C(34) C 0.0065(4) 0.3237(4) 0.9018(3) 0.0310(19) Uani 1.00 1 d . . .
 C(35) C 0.2819(4) 0.4044(3) 1.1704(2) 0.0280(18) Uani 1.00 1 d . . .
 C(36) C 0.1785(4) 0.4062(3) 1.1681(2) 0.0275(18) Uani 1.00 1 d . . .
 C(37) C 0.4291(4) 0.3947(3) 1.0915(2) 0.0243(16) Uani 1.00 1 d . . .
 C(38) C 0.4734(4) 0.3552(4) 1.1343(3) 0.035(2) Uani 1.00 1 d . . .
 C(39) C 0.5592(4) 0.3294(4) 1.1266(3) 0.046(2) Uani 1.00 1 d . . .
 C(40) C 0.5996(4) 0.3437(4) 1.0761(4) 0.049(2) Uani 1.00 1 d . . .
 C(41) C 0.5564(4) 0.3841(5) 1.0325(4) 0.051(2) Uani 1.00 1 d . . .
 C(42) C 0.4706(4) 0.4093(4) 1.0402(3) 0.036(2) Uani 1.00 1 d . . .
 C(43) C 0.3280(4) 0.5238(3) 1.0978(2) 0.0284(18) Uani 1.00 1 d . . .
 C(44) C 0.4088(5) 0.5542(4) 1.1228(4) 0.052(2) Uani 1.00 1 d . . .
 C(45) C 0.4165(7) 0.6267(5) 1.1250(4) 0.071(3) Uani 1.00 1 d . . .
 C(46) C 0.3467(6) 0.6697(4) 1.1015(3) 0.052(2) Uani 1.00 1 d . . .
 C(47) C 0.2697(5) 0.6396(4) 1.0769(3) 0.037(2) Uani 1.00 1 d . . .
 C(48) C 0.2599(4) 0.5672(4) 1.0750(2) 0.0303(19) Uani 1.00 1 d . . .
 C(49) C 0.1602(3) 0.2641(3) 1.1261(2) 0.0218(16) Uani 1.00 1 d . . .
 C(50) C 0.1219(4) 0.2379(4) 1.1757(2) 0.0286(18) Uani 1.00 1 d . . .
 C(51) C 0.1405(4) 0.1700(4) 1.1943(3) 0.036(2) Uani 1.00 1 d . . .
 C(52) C 0.1971(4) 0.1275(4) 1.1627(3) 0.035(2) Uani 1.00 1 d . . .
 C(53) C 0.2343(4) 0.1533(3) 1.1130(3) 0.033(2) Uani 1.00 1 d . . .
 C(54) C 0.2159(4) 0.2216(3) 1.0946(2) 0.0273(17) Uani 1.00 1 d . . .
 C(55) C 0.0198(3) 0.3683(3) 1.0925(2) 0.0200(15) Uani 1.00 1 d . . .
 C(56) C -0.0430(4) 0.3144(3) 1.0938(2) 0.0263(17) Uani 1.00 1 d . . .
 C(57) C -0.1336(4) 0.3293(4) 1.0815(3) 0.0320(19) Uani 1.00 1 d . . .
 C(58) C -0.1612(4) 0.3978(4) 1.0691(3) 0.0319(19) Uani 1.00 1 d . . .
 C(59) C -0.0985(4) 0.4521(3) 1.0670(3) 0.0295(18) Uani 1.00 1 d . . .
 C(60) C -0.0079(4) 0.4372(3) 1.0784(2) 0.0257(17) Uani 1.00 1 d . . .
 C(61) C 0.3283(5) 0.8968(5) 0.0633(4) 0.057(2) Uani 1.00 1 d . . .
 C(62) C 0.2990(7) 0.8368(4) 0.0887(6) 0.101(4) Uani 1.00 1 d . . .
 C(63) C 0.2414(11) 0.8505(8) 0.1321(8) 0.148(7) Uani 1.00 1 d . . .
 C(64) C 0.2074(10) 0.9160(6) 0.1243(7) 0.119(6) Uani 1.00 1 d . . .
 H(1) H 0.1804 0.3008 1.3491 0.030 Uiso 1.00 1 c R . .
 H(2) H 0.2220 0.2784 1.4100 0.030 Uiso 1.00 1 c R . .
 H(3) H 0.1764 0.3835 1.4511 0.031 Uiso 1.00 1 c R . .
 H(4) H 0.0919 0.3530 1.4173 0.031 Uiso 1.00 1 c R . .
 H(5) H 0.3914 0.2594 1.4462 0.042 Uiso 1.00 1 c R . .
 H(6) H 0.4697 0.2594 1.5390 0.045 Uiso 1.00 1 c R . .
 H(7) H 0.4961 0.3652 1.5875 0.041 Uiso 1.00 1 c R . .
 H(8) H 0.4481 0.4712 1.5454 0.036 Uiso 1.00 1 c R . .
 H(9) H 0.3699 0.4715 1.4533 0.030 Uiso 1.00 1 c R . .
 H(10) H 0.2733 0.2600 1.2784 0.034 Uiso 1.00 1 c R . .
 H(11) H 0.3589 0.1942 1.2165 0.043 Uiso 1.00 1 c R . .
 H(12) H 0.5144 0.2052 1.2212 0.042 Uiso 1.00 1 c R . .
 H(13) H 0.5856 0.2786 1.2903 0.038 Uiso 1.00 1 c R . .
 H(14) H 0.5017 0.3424 1.3558 0.033 Uiso 1.00 1 c R . .
 H(15) H -0.0275 0.4945 1.4077 0.056 Uiso 1.00 1 c R . .
 H(16) H -0.0734 0.5944 1.4598 0.063 Uiso 1.00 1 c R . .
 H(17) H 0.0285 0.6764 1.4952 0.068 Uiso 1.00 1 c R . .
 H(18) H 0.1771 0.6661 1.4750 0.060 Uiso 1.00 1 c R . .
 H(19) H 0.2273 0.5698 1.4224 0.044 Uiso 1.00 1 c R . .
 H(20) H 0.0284 0.3331 1.3295 0.038 Uiso 1.00 1 c R . .
 H(21) H -0.0877 0.3176 1.2550 0.048 Uiso 1.00 1 c R . .
 H(22) H -0.1309 0.4129 1.1953 0.046 Uiso 1.00 1 c R . .
 H(23) H -0.0577 0.5202 1.2066 0.044 Uiso 1.00 1 c R . .
 H(24) H 0.0606 0.5346 1.2780 0.038 Uiso 1.00 1 c R . .
 H(25) H 0.3020 0.3580 1.1798 0.033 Uiso 1.00 1 c R . .
 H(26) H 0.3066 0.4365 1.1989 0.033 Uiso 1.00 1 c R . .
 H(27) H 0.1583 0.4535 1.1643 0.033 Uiso 1.00 1 c R . .
 H(28) H 0.1570 0.3862 1.2026 0.033 Uiso 1.00 1 c R . .
 H(29) H 0.4447 0.3460 1.1694 0.041 Uiso 1.00 1 c R . .
 H(30) H 0.5898 0.3026 1.1567 0.055 Uiso 1.00 1 c R . .
 H(31) H 0.6575 0.3251 1.0704 0.059 Uiso 1.00 1 c R . .
 H(32) H 0.5857 0.3950 0.9979 0.062 Uiso 1.00 1 c R . .
 H(33) H 0.4397 0.4360 1.0103 0.044 Uiso 1.00 1 c R . .
 H(34) H 0.4567 0.5248 1.1372 0.060 Uiso 1.00 1 c R . .
 H(35) H 0.4690 0.6479 1.1427 0.082 Uiso 1.00 1 c R . .
 H(36) H 0.3532 0.7195 1.1021 0.061 Uiso 1.00 1 c R . .
 H(37) H 0.2224 0.6692 1.0618 0.045 Uiso 1.00 1 c R . .
 H(38) H 0.2066 0.5467 1.0576 0.037 Uiso 1.00 1 c R . .
 H(39) H 0.0832 0.2668 1.1968 0.034 Uiso 1.00 1 c R . .
 H(40) H 0.1143 0.1520 1.2281 0.044 Uiso 1.00 1 c R . .
 H(41) H 0.2102 0.0809 1.1757 0.042 Uiso 1.00 1 c R . .
 H(42) H 0.2727 0.1242 1.0918 0.040 Uiso 1.00 1 c R . .
 H(43) H 0.2415 0.2395 1.0606 0.033 Uiso 1.00 1 c R . .
 H(44) H -0.0243 0.2677 1.1030 0.032 Uiso 1.00 1 c R . .
 H(45) H -0.1769 0.2926 1.0818 0.039 Uiso 1.00 1 c R . .
 H(46) H -0.2233 0.4076 1.0616 0.039 Uiso 1.00 1 c R . .
 H(47) H -0.1181 0.4988 1.0585 0.036 Uiso 1.00 1 c R . .
 H(48) H 0.0354 0.4737 1.0762 0.031 Uiso 1.00 1 c R . .
 H(49) H 0.3244 0.8929 0.0219 0.068 Uiso 1.00 1 c R . .
 H(50) H 0.3887 0.9058 0.0766 0.068 Uiso 1.00 1 c R . .
 H(51) H 0.2667 0.8100 0.0593 0.126 Uiso 1.00 1 c R . .
 H(52) H 0.3492 0.8104 0.1039 0.126 Uiso 1.00 1 c R . .
 H(53) H 0.1945 0.8165 0.1307 0.181 Uiso 1.00 1 c R . .
 H(54) H 0.2751 0.8470 0.1685 0.181 Uiso 1.00 1 c R . .
 H(55) H 0.2099 0.9394 0.1611 0.147 Uiso 1.00 1 c R . .
 H(56) H 0.1468 0.9136 0.1091 0.147 Uiso 1.00 1 c R . .


loop_
_atom_site_aniso_label
_atom_site_aniso_U_11
_atom_site_aniso_U_22
_atom_site_aniso_U_33
_atom_site_aniso_U_12
_atom_site_aniso_U_13
_atom_site_aniso_U_23
 Pt(1) 0.02035(12) 0.01738(12) 0.01848(12) -0.00012(10) 0.00236(9) -0.00012(10)
 Pt(2) 0.01758(11) 0.01641(12) 0.01568(11) -0.00088(9) 0.00285(8) 0.00002(10)
 P(1) 0.0237(8) 0.0163(8) 0.0212(7) 0.0013(6) 0.0040(6) -0.0001(6)
 P(2) 0.0220(8) 0.0241(9) 0.0203(7) 0.0016(6) 0.0044(6) 0.0002(6)
 P(3) 0.0235(8) 0.0192(8) 0.0208(8) -0.0001(6) -0.0016(6) -0.0000(6)
 P(4) 0.0208(7) 0.0187(8) 0.0206(7) 0.0021(6) 0.0063(6) 0.0015(6)
 F(1) 0.053(3) 0.210(9) 0.054(3) -0.070(4) -0.007(2) 0.031(4)
 F(2) 0.075(3) 0.051(3) 0.067(3) -0.008(2) 0.024(2) 0.026(2)
 F(3) 0.100(4) 0.052(3) 0.105(4) 0.001(3) 0.082(4) -0.004(3)
 F(4) 0.099(4) 0.090(5) 0.198(8) 0.068(4) 0.080(5) 0.083(5)
 F(5) 0.092(4) 0.046(4) 0.260(10) -0.022(3) -0.038(5) 0.075(5)
 F(6) 0.258(10) 0.073(5) 0.077(5) 0.060(6) -0.038(5) 0.025(4)
 F(7) 0.234(9) 0.134(7) 0.055(3) -0.142(7) 0.044(5) -0.006(4)
 F(8) 0.116(5) 0.244(11) 0.074(4) 0.098(6) 0.039(4) 0.100(6)
 F(9) 0.213(7) 0.044(3) 0.071(4) 0.012(4) 0.101(4) -0.001(3)
 F(10) 0.054(2) 0.045(3) 0.080(3) 0.020(2) -0.037(2) -0.015(2)
 F(11) 0.056(2) 0.114(5) 0.023(2) 0.002(3) -0.006(2) -0.004(2)
 F(12) 0.047(2) 0.049(3) 0.084(3) -0.020(2) -0.022(2) -0.010(2)
 O(1) 0.021(2) 0.031(2) 0.018(2) -0.0047(18) 0.0030(16) 0.0034(19)
 O(2) 0.031(2) 0.059(3) 0.021(2) -0.010(2) 0.000(2) -0.000(2)
 O(3) 0.028(2) 0.024(2) 0.033(2) 0.003(2) -0.000(2) 0.009(2)
 O(4) 0.044(3) 0.032(3) 0.064(3) 0.002(2) -0.014(2) -0.007(2)
 O(5) 0.025(2) 0.022(2) 0.017(2) -0.0057(18) 0.0064(17) 0.0011(17)
 O(6) 0.053(3) 0.022(2) 0.036(2) 0.001(2) 0.017(2) -0.003(2)
 O(7) 0.020(2) 0.022(2) 0.021(2) -0.0012(17) -0.0019(16) -0.0003(18)
 O(8) 0.041(2) 0.018(2) 0.032(2) -0.005(2) 0.004(2) -0.001(2)
 O(9) 0.131(7) 0.078(7) 0.129(8) 0.002(5) 0.028(6) 0.002(6)
 C(1) 0.034(3) 0.023(3) 0.017(3) -0.006(2) 0.001(2) -0.001(2)
 C(2) 0.030(3) 0.049(5) 0.029(3) -0.011(3) 0.002(3) 0.001(3)
 C(3) 0.037(3) 0.023(4) 0.041(4) 0.003(3) 0.010(3) 0.002(3)
 C(4) 0.051(4) 0.030(4) 0.053(5) 0.004(3) 0.009(4) 0.020(4)
 C(5) 0.019(2) 0.024(3) 0.033(3) 0.000(2) 0.007(2) -0.001(2)
 C(6) 0.025(3) 0.026(3) 0.028(3) -0.003(2) 0.005(2) 0.004(2)
 C(7) 0.024(3) 0.024(3) 0.027(3) -0.005(2) 0.003(2) -0.000(2)
 C(8) 0.043(4) 0.030(4) 0.032(3) -0.002(3) -0.007(3) 0.001(3)
 C(9) 0.047(4) 0.027(4) 0.039(4) 0.005(3) -0.003(3) 0.009(3)
 C(10) 0.038(4) 0.042(4) 0.024(3) 0.000(3) 0.004(2) 0.004(3)
 C(11) 0.030(3) 0.036(4) 0.023(3) -0.010(3) 0.010(2) -0.006(3)
 C(12) 0.025(3) 0.024(3) 0.026(3) -0.002(2) 0.007(2) -0.001(2)
 C(13) 0.026(3) 0.016(3) 0.026(3) 0.004(2) 0.007(2) 0.002(2)
 C(14) 0.023(3) 0.033(4) 0.030(3) -0.001(2) -0.004(2) -0.002(3)
 C(15) 0.054(4) 0.029(4) 0.024(3) 0.002(3) 0.005(3) -0.005(3)
 C(16) 0.050(4) 0.026(4) 0.028(3) 0.008(3) 0.015(3) -0.001(3)
 C(17) 0.029(3) 0.029(4) 0.036(3) 0.002(2) 0.011(2) 0.005(3)
 C(18) 0.023(3) 0.031(4) 0.029(3) 0.001(2) 0.006(2) -0.008(3)
 C(19) 0.033(3) 0.028(4) 0.016(2) 0.015(2) 0.002(2) -0.002(2)
 C(20) 0.041(4) 0.066(6) 0.032(4) 0.020(4) 0.008(3) -0.011(4)
 C(21) 0.057(5) 0.071(7) 0.028(4) 0.034(5) 0.010(3) 0.001(4)
 C(22) 0.097(7) 0.043(5) 0.031(4) 0.042(5) 0.004(4) -0.002(3)
 C(23) 0.082(6) 0.030(4) 0.040(4) 0.010(4) 0.008(4) -0.006(3)
 C(24) 0.048(4) 0.030(4) 0.032(3) 0.008(3) 0.005(3) 0.002(3)
 C(25) 0.016(2) 0.034(4) 0.022(3) -0.002(2) 0.006(2) -0.001(2)
 C(26) 0.032(3) 0.032(4) 0.033(3) -0.003(3) -0.001(2) -0.004(3)
 C(27) 0.034(3) 0.047(5) 0.039(4) -0.005(3) 0.007(3) -0.015(3)
 C(28) 0.029(3) 0.060(5) 0.026(3) 0.005(3) -0.001(2) -0.011(3)
 C(29) 0.036(3) 0.049(5) 0.026(3) -0.000(3) -0.001(3) 0.002(3)
 C(30) 0.027(3) 0.036(4) 0.031(3) -0.001(3) 0.004(2) 0.003(3)
 C(31) 0.023(3) 0.029(4) 0.026(3) 0.001(2) 0.007(2) -0.000(2)
 C(32) 0.028(3) 0.045(4) 0.028(3) -0.002(3) 0.013(2) 0.002(3)
 C(33) 0.020(3) 0.024(3) 0.023(3) -0.004(2) 0.009(2) -0.004(2)
 C(34) 0.019(3) 0.032(4) 0.041(4) 0.002(2) -0.006(2) -0.007(3)
 C(35) 0.038(3) 0.032(4) 0.014(2) -0.002(3) -0.001(2) 0.003(2)
 C(36) 0.033(3) 0.029(4) 0.021(3) -0.003(2) 0.006(2) -0.002(2)
 C(37) 0.019(3) 0.019(3) 0.035(3) -0.004(2) 0.003(2) 0.005(2)
 C(38) 0.032(3) 0.028(4) 0.044(4) -0.002(3) -0.002(3) 0.012(3)
 C(39) 0.033(4) 0.044(5) 0.060(5) -0.002(3) -0.010(3) 0.019(4)
 C(40) 0.018(3) 0.040(5) 0.089(6) 0.007(3) 0.010(3) 0.016(4)
 C(41) 0.021(3) 0.066(6) 0.069(6) -0.000(3) 0.015(3) 0.021(5)
 C(42) 0.022(3) 0.047(5) 0.040(4) -0.002(3) 0.005(3) 0.010(3)
 C(43) 0.041(3) 0.016(3) 0.027(3) -0.000(2) -0.006(2) 0.004(2)
 C(44) 0.063(5) 0.020(4) 0.067(5) -0.002(3) -0.043(4) -0.005(3)
 C(45) 0.087(7) 0.031(5) 0.088(7) -0.007(4) -0.055(6) -0.011(5)
 C(46) 0.084(6) 0.022(4) 0.047(4) 0.004(4) -0.021(4) -0.010(3)
 C(47) 0.050(4) 0.018(3) 0.043(4) 0.001(3) 0.005(3) -0.001(3)
 C(48) 0.026(3) 0.034(4) 0.031(3) 0.000(3) 0.004(2) 0.004(3)
 C(49) 0.020(2) 0.020(3) 0.026(3) -0.001(2) 0.001(2) 0.006(2)
 C(50) 0.025(3) 0.034(4) 0.027(3) 0.006(2) 0.006(2) 0.008(3)
 C(51) 0.032(3) 0.037(4) 0.041(4) -0.001(3) 0.005(3) 0.019(3)
 C(52) 0.036(3) 0.021(3) 0.048(4) 0.000(3) -0.003(3) 0.010(3)
 C(53) 0.031(3) 0.023(3) 0.046(4) 0.006(2) 0.001(3) -0.005(3)
 C(54) 0.028(3) 0.022(3) 0.032(3) 0.002(2) 0.003(2) 0.004(2)
 C(55) 0.020(2) 0.023(3) 0.018(2) 0.002(2) 0.007(2) -0.002(2)
 C(56) 0.022(3) 0.023(3) 0.034(3) 0.006(2) 0.002(2) 0.004(2)
 C(57) 0.029(3) 0.024(3) 0.043(4) -0.002(3) 0.005(3) -0.004(3)
 C(58) 0.025(3) 0.033(4) 0.038(3) 0.010(3) 0.005(2) 0.003(3)
 C(59) 0.029(3) 0.027(4) 0.034(3) 0.005(2) 0.008(2) 0.011(3)
 C(60) 0.027(3) 0.018(3) 0.032(3) 0.001(2) 0.006(2) 0.007(2)
 C(61) 0.047(5) 0.053(6) 0.071(6) 0.003(4) 0.003(4) -0.003(5)
 C(62) 0.096(8) 0.016(4) 0.204(14) 0.034(5) 0.106(9) 0.042(6)
 C(63) 0.148(14) 0.074(10) 0.23(2) 0.051(10) 0.083(14) 0.084(12)
 C(64) 0.151(13) 0.050(8) 0.165(15) 0.007(8) 0.101(11) 0.025(9)

#==============================================================================

_computing_data_collection            'CrystalClear'
_computing_cell_refinement            'CrystalClear'
_computing_data_reduction             'CrystalStructure'
_computing_structure_solution         'SIR92'
_computing_structure_refinement       'CRYSTALS'
_computing_publication_material       'CrystalStructure 3.7.0'
_computing_molecular_graphics          ?

#==============================================================================

# MOLECULAR GEOMETRY

_geom_special_details
;
    ?
;

loop_
_geom_bond_atom_site_label_1
_geom_bond_atom_site_label_2
_geom_bond_distance
_geom_bond_publ_flag
_geom_bond_site_symmetry_1
_geom_bond_site_symmetry_2
Pt(1) P(1) 2.2205(16) yes . .
Pt(1) P(2) 2.2074(16) yes . .
Pt(1) O(1) 2.078(4) yes . .
Pt(1) O(3) 2.096(4) yes . .
Pt(2) P(3) 2.2135(15) no . .
Pt(2) P(4) 2.2079(16) no . .
Pt(2) O(5) 2.094(4) no . .
Pt(2) O(7) 2.081(3) no . .
P(1) C(5) 1.833(6) no . .
P(1) C(7) 1.811(6) no . .
P(1) C(13) 1.809(6) no . .
P(2) C(6) 1.830(7) no . .
P(2) C(19) 1.797(6) no . .
P(2) C(25) 1.816(6) no . .
P(3) C(35) 1.836(6) no . .
P(3) C(37) 1.805(6) no . .
P(3) C(43) 1.809(7) no . .
P(4) C(36) 1.828(6) no . .
P(4) C(49) 1.818(6) no . .
P(4) C(55) 1.797(6) no . .
F(1) C(2) 1.292(9) no . .
F(2) C(2) 1.333(9) no . .
F(3) C(2) 1.315(10) no . .
F(4) C(4) 1.299(11) no . .
F(5) C(4) 1.276(11) no . .
F(6) C(4) 1.279(11) no . .
F(7) C(32) 1.262(12) no . .
F(8) C(32) 1.271(10) no . .
F(9) C(32) 1.269(10) no . .
F(10) C(34) 1.312(8) no . .
F(11) C(34) 1.336(8) no . .
F(12) C(34) 1.334(8) no . .
O(1) C(1) 1.264(7) no . .
O(2) C(1) 1.208(7) no . .
O(3) C(3) 1.275(8) no . .
O(4) C(3) 1.219(9) no . .
O(5) C(31) 1.286(8) no . .
O(6) C(31) 1.206(9) no . .
O(7) C(33) 1.280(8) no . .
O(8) C(33) 1.207(8) no . .
O(9) C(61) 1.538(14) no . .
O(9) C(64) 1.537(19) no . .
C(1) C(2) 1.541(10) no . .
C(3) C(4) 1.532(11) no . .
C(5) C(6) 1.535(9) no . .
C(7) C(8) 1.389(10) no . .
C(7) C(12) 1.393(9) no . .
C(8) C(9) 1.399(10) no . .
C(9) C(10) 1.368(11) no . .
C(10) C(11) 1.384(11) no . .
C(11) C(12) 1.390(8) no . .
C(13) C(14) 1.396(9) no . .
C(13) C(18) 1.397(8) no . .
C(14) C(15) 1.375(10) no . .
C(15) C(16) 1.376(10) no . .
C(16) C(17) 1.371(10) no . .
C(17) C(18) 1.396(9) no . .
C(19) C(20) 1.403(10) no . .
C(19) C(24) 1.385(10) no . .
C(20) C(21) 1.401(13) no . .
C(21) C(22) 1.358(14) no . .
C(22) C(23) 1.356(14) no . .
C(23) C(24) 1.380(12) no . .
C(25) C(26) 1.391(10) no . .
C(25) C(30) 1.384(10) no . .
C(26) C(27) 1.412(10) no . .
C(27) C(28) 1.383(11) no . .
C(28) C(29) 1.378(12) no . .
C(29) C(30) 1.394(9) no . .
C(31) C(32) 1.531(10) no . .
C(33) C(34) 1.538(8) no . .
C(35) C(36) 1.540(9) no . .
C(37) C(38) 1.371(9) no . .
C(37) C(42) 1.386(10) no . .
C(38) C(39) 1.391(10) no . .
C(39) C(40) 1.364(12) no . .
C(40) C(41) 1.386(12) no . .
C(41) C(42) 1.386(10) no . .
C(43) C(44) 1.423(10) no . .
C(43) C(48) 1.385(9) no . .
C(44) C(45) 1.382(12) no . .
C(45) C(46) 1.404(13) no . .
C(46) C(47) 1.372(11) no . .
C(47) C(48) 1.383(10) no . .
C(49) C(50) 1.394(9) no . .
C(49) C(54) 1.391(9) no . .
C(50) C(51) 1.379(11) no . .
C(51) C(52) 1.400(10) no . .
C(52) C(53) 1.385(10) no . .
C(53) C(54) 1.385(10) no . .
C(55) C(56) 1.388(9) no . .
C(55) C(60) 1.403(9) no . .
C(56) C(57) 1.392(8) no . .
C(57) C(58) 1.387(10) no . .
C(58) C(59) 1.394(10) no . .
C(59) C(60) 1.390(9) no . .
C(61) C(62) 1.361(14) no . .
C(62) C(63) 1.38(2) no . .
C(63) C(64) 1.35(2) no . .

loop_
_geom_angle_atom_site_label_1
_geom_angle_atom_site_label_2
_geom_angle_atom_site_label_3
_geom_angle
_geom_angle_publ_flag
_geom_angle_site_symmetry_1
_geom_angle_site_symmetry_2
_geom_angle_site_symmetry_3
P(1) Pt(1) P(2) 86.60(6) yes . . .
P(1) Pt(1) O(1) 96.74(13) yes . . .
P(1) Pt(1) O(3) 175.55(12) yes . . .
P(2) Pt(1) O(1) 173.74(11) no . . .
P(2) Pt(1) O(3) 90.53(13) yes . . .
O(1) Pt(1) O(3) 85.80(17) yes . . .
P(3) Pt(2) P(4) 86.15(6) no . . .
P(3) Pt(2) O(5) 94.05(11) no . . .
P(3) Pt(2) O(7) 171.65(13) no . . .
P(4) Pt(2) O(5) 173.85(12) no . . .
P(4) Pt(2) O(7) 96.83(12) no . . .
O(5) Pt(2) O(7) 82.14(16) no . . .
Pt(1) P(1) C(5) 106.6(2) no . . .
Pt(1) P(1) C(7) 116.5(2) no . . .
Pt(1) P(1) C(13) 113.7(2) no . . .
C(5) P(1) C(7) 103.9(3) no . . .
C(5) P(1) C(13) 109.1(3) no . . .
C(7) P(1) C(13) 106.4(2) no . . .
Pt(1) P(2) C(6) 108.3(2) no . . .
Pt(1) P(2) C(19) 114.8(2) no . . .
Pt(1) P(2) C(25) 112.3(2) no . . .
C(6) P(2) C(19) 109.4(3) no . . .
C(6) P(2) C(25) 107.4(3) no . . .
C(19) P(2) C(25) 104.4(3) no . . .
Pt(2) P(3) C(35) 109.2(2) no . . .
Pt(2) P(3) C(37) 116.8(2) no . . .
Pt(2) P(3) C(43) 110.6(2) no . . .
C(35) P(3) C(37) 107.3(3) no . . .
C(35) P(3) C(43) 106.4(3) no . . .
C(37) P(3) C(43) 105.9(3) no . . .
Pt(2) P(4) C(36) 106.0(2) no . . .
Pt(2) P(4) C(49) 116.5(2) no . . .
Pt(2) P(4) C(55) 112.1(2) no . . .
C(36) P(4) C(49) 103.9(3) no . . .
C(36) P(4) C(55) 108.3(3) no . . .
C(49) P(4) C(55) 109.3(2) no . . .
Pt(1) O(1) C(1) 120.0(3) no . . .
Pt(1) O(3) C(3) 119.2(4) no . . .
Pt(2) O(5) C(31) 114.5(4) no . . .
Pt(2) O(7) C(33) 124.1(3) no . . .
C(61) O(9) C(64) 101.1(8) no . . .
O(1) C(1) O(2) 129.7(6) no . . .
O(1) C(1) C(2) 112.0(5) no . . .
O(2) C(1) C(2) 118.2(5) no . . .
F(1) C(2) F(2) 105.3(7) no . . .
F(1) C(2) F(3) 110.6(6) no . . .
F(1) C(2) C(1) 112.8(6) no . . .
F(2) C(2) F(3) 105.4(6) no . . .
F(2) C(2) C(1) 111.0(6) no . . .
F(3) C(2) C(1) 111.4(6) no . . .
O(3) C(3) O(4) 130.0(6) no . . .
O(3) C(3) C(4) 112.0(6) no . . .
O(4) C(3) C(4) 118.0(6) no . . .
F(4) C(4) F(5) 106.8(8) no . . .
F(4) C(4) F(6) 102.1(8) no . . .
F(4) C(4) C(3) 109.9(7) no . . .
F(5) C(4) F(6) 107.9(8) no . . .
F(5) C(4) C(3) 115.0(7) no . . .
F(6) C(4) C(3) 114.2(7) no . . .
P(1) C(5) C(6) 106.4(4) no . . .
P(2) C(6) C(5) 108.1(4) no . . .
P(1) C(7) C(8) 118.6(5) no . . .
P(1) C(7) C(12) 121.7(5) no . . .
C(8) C(7) C(12) 119.6(6) no . . .
C(7) C(8) C(9) 120.2(6) no . . .
C(8) C(9) C(10) 119.4(7) no . . .
C(9) C(10) C(11) 121.1(6) no . . .
C(10) C(11) C(12) 119.8(6) no . . .
C(7) C(12) C(11) 119.9(6) no . . .
P(1) C(13) C(14) 121.2(4) no . . .
P(1) C(13) C(18) 119.3(4) no . . .
C(14) C(13) C(18) 119.4(6) no . . .
C(13) C(14) C(15) 120.1(6) no . . .
C(14) C(15) C(16) 120.7(6) no . . .
C(15) C(16) C(17) 120.0(6) no . . .
C(16) C(17) C(18) 120.6(6) no . . .
C(13) C(18) C(17) 119.2(6) no . . .
P(2) C(19) C(20) 120.6(5) no . . .
P(2) C(19) C(24) 120.2(5) no . . .
C(20) C(19) C(24) 119.2(6) no . . .
C(19) C(20) C(21) 118.2(7) no . . .
C(20) C(21) C(22) 121.8(8) no . . .
C(21) C(22) C(23) 119.3(8) no . . .
C(22) C(23) C(24) 121.4(8) no . . .
C(19) C(24) C(23) 120.0(7) no . . .
P(2) C(25) C(26) 122.0(5) no . . .
P(2) C(25) C(30) 118.4(5) no . . .
C(26) C(25) C(30) 119.7(5) no . . .
C(25) C(26) C(27) 120.4(6) no . . .
C(26) C(27) C(28) 119.0(7) no . . .
C(27) C(28) C(29) 120.2(6) no . . .
C(28) C(29) C(30) 120.9(7) no . . .
C(25) C(30) C(29) 119.7(7) no . . .
O(5) C(31) O(6) 129.2(6) no . . .
O(5) C(31) C(32) 111.6(6) no . . .
O(6) C(31) C(32) 119.1(6) no . . .
F(7) C(32) F(8) 105.3(8) no . . .
F(7) C(32) F(9) 107.5(7) no . . .
F(7) C(32) C(31) 113.5(6) no . . .
F(8) C(32) F(9) 105.8(7) no . . .
F(8) C(32) C(31) 110.5(6) no . . .
F(9) C(32) C(31) 113.6(6) no . . .
O(7) C(33) O(8) 129.7(5) no . . .
O(7) C(33) C(34) 110.5(5) no . . .
O(8) C(33) C(34) 119.7(6) no . . .
F(10) C(34) F(11) 107.3(6) no . . .
F(10) C(34) F(12) 107.1(5) no . . .
F(10) C(34) C(33) 114.0(6) no . . .
F(11) C(34) F(12) 105.5(6) no . . .
F(11) C(34) C(33) 111.0(5) no . . .
F(12) C(34) C(33) 111.6(6) no . . .
P(3) C(35) C(36) 107.7(4) no . . .
P(4) C(36) C(35) 107.0(4) no . . .
P(3) C(37) C(38) 123.2(5) no . . .
P(3) C(37) C(42) 117.2(5) no . . .
C(38) C(37) C(42) 119.5(6) no . . .
C(37) C(38) C(39) 120.7(7) no . . .
C(38) C(39) C(40) 119.5(7) no . . .
C(39) C(40) C(41) 120.7(7) no . . .
C(40) C(41) C(42) 119.4(8) no . . .
C(37) C(42) C(41) 120.1(7) no . . .
P(3) C(43) C(44) 118.5(5) no . . .
P(3) C(43) C(48) 121.8(5) no . . .
C(44) C(43) C(48) 119.7(6) no . . .
C(43) C(44) C(45) 119.0(7) no . . .
C(44) C(45) C(46) 120.4(8) no . . .
C(45) C(46) C(47) 119.9(8) no . . .
C(46) C(47) C(48) 120.7(7) no . . .
C(43) C(48) C(47) 120.3(6) no . . .
P(4) C(49) C(50) 119.4(5) no . . .
P(4) C(49) C(54) 120.5(4) no . . .
C(50) C(49) C(54) 120.1(6) no . . .
C(49) C(50) C(51) 120.1(6) no . . .
C(50) C(51) C(52) 119.6(6) no . . .
C(51) C(52) C(53) 120.4(7) no . . .
C(52) C(53) C(54) 119.9(6) no . . .
C(49) C(54) C(53) 119.9(6) no . . .
P(4) C(55) C(56) 123.7(5) no . . .
P(4) C(55) C(60) 116.1(4) no . . .
C(56) C(55) C(60) 120.1(5) no . . .
C(55) C(56) C(57) 119.6(6) no . . .
C(56) C(57) C(58) 120.3(6) no . . .
C(57) C(58) C(59) 120.5(6) no . . .
C(58) C(59) C(60) 119.3(6) no . . .
C(55) C(60) C(59) 120.2(6) no . . .
O(9) C(61) C(62) 106.0(8) no . . .
C(61) C(62) C(63) 112.4(10) no . . .
C(62) C(63) C(64) 108.9(14) no . . .
O(9) C(64) C(63) 108.1(13) no . . .


data_form4

# CHEMICAL DATA

_chemical_formula_sum                  'C40 H38 O2 P2 Pt '
_chemical_formula_moiety               'C40 H38 O2 P2 Pt '
_chemical_formula_weight               807.78
_chemical_melting_point                ?

#==============================================================================

# CRYSTAL DATA
_symmetry_cell_setting                 triclinic
_symmetry_space_group_name_H-M        'P -1'
_symmetry_space_group_name_Hall       '-P 1'
_symmetry_Int_Tables_number            2
loop_
_symmetry_equiv_pos_site_id
_symmetry_equiv_pos_as_xyz
1   '+X,+Y,+Z'
2   '-X,-Y,-Z'

#------------------------------------------------------------------------------

_cell_length_a                         10.3823(19)
_cell_length_b                         11.367(2)
_cell_length_c                         14.227(3)
_cell_angle_alpha                      92.374(2)
_cell_angle_beta                       93.196(3)
_cell_angle_gamma                      98.853(4)
_cell_volume                           1654.2(5)
_cell_formula_units_Z                  2
_cell_measurement_reflns_used          5099
_cell_measurement_theta_min            3.1
_cell_measurement_theta_max            27.5
_cell_measurement_temperature          113.1

#------------------------------------------------------------------------------

_exptl_crystal_description            'prism'
_exptl_crystal_colour                 'colorless'
_exptl_crystal_size_max                0.32
_exptl_crystal_size_mid                0.08
_exptl_crystal_size_min                0.04
_exptl_crystal_density_diffrn          1.622
_exptl_crystal_density_meas            ?
_exptl_crystal_density_method         'not measured'
_exptl_crystal_F_000                   804.00
_exptl_absorpt_coefficient_mu          4.356
_exptl_absorpt_correction_type         multi-scan
_exptl_absorpt_process_details         
'Jacobson, R. (1998) Private communication'
_exptl_absorpt_correction_T_min        0.648
_exptl_absorpt_correction_T_max        0.840

#==============================================================================

# EXPERIMENTAL DATA

_diffrn_radiation_type                'Mo K\a'
_diffrn_radiation_wavelength           0.71070
_diffrn_measurement_device_type       'Rigaku Saturn'
_diffrn_measurement_method             \w
_diffrn_detector_area_resol_mean       7.31
_diffrn_reflns_number                  12550
_diffrn_reflns_av_R_equivalents        0.029
_diffrn_reflns_theta_max               27.48
_diffrn_measured_fraction_theta_max    0.935
_diffrn_reflns_theta_full              27.48
_diffrn_measured_fraction_theta_full   0.935
_diffrn_reflns_limit_h_min             -10
_diffrn_reflns_limit_h_max             13
_diffrn_reflns_limit_k_min             -11
_diffrn_reflns_limit_k_max             14
_diffrn_reflns_limit_l_min             -18
_diffrn_reflns_limit_l_max             18

#==============================================================================

# REFINEMENT DATA

_refine_special_details
;
    Refinement using reflections with F^2^ > 2.0 sigma(F^2^).
    The weighted R-factor(wR), goodness of fit (S) and R-factor (gt) are 
    based on F, with F set to zero for negative F. The threshold expression of
    F^2^ > 2.0 sigma(F^2^) is used only for calculating R-factor (gt).
;
_reflns_number_total                   7107
_reflns_number_gt                      6543
_reflns_threshold_expression           F^2^>2.0\s(F^2^)
_refine_ls_structure_factor_coef       F
_refine_ls_R_factor_gt                 0.0419
_refine_ls_wR_factor_ref               0.0650
_refine_ls_hydrogen_treatment          refall
_refine_ls_number_reflns               6571
_refine_ls_number_parameters           444
_refine_ls_goodness_of_fit_ref         0.999
_refine_ls_weighting_scheme            calc
_refine_ls_weighting_details
'w = 1/[0.0020Fo^2^ + 1.0000\s(Fo^2^)]'
_refine_ls_shift/su_max                0.0036
_refine_diff_density_max               0.00
_refine_diff_density_min               0.00
_refine_ls_extinction_method           none
_refine_ls_extinction_coef             ?

loop_
_atom_type_symbol
_atom_type_description
_atom_type_scat_dispersion_real
_atom_type_scat_dispersion_imag
_atom_type_scat_source
  'C' 'C'  0.003 0.002 
;
International Tables for Crystallography
(1992, Vol. C, Tables 4.2.6.8 and 6.1.1.4)
;
  'H' 'H'  0.000 0.000 
;
International Tables for Crystallography
(1992, Vol. C, Table 6.1.1.4)
;
  'O' 'O'  0.011 0.006 
;
International Tables for Crystallography
(1992, Vol. C, Tables 4.2.6.8 and 6.1.1.4)
;
  'P' 'P'  0.102 0.094 
;
International Tables for Crystallography
(1992, Vol. C, Tables 4.2.6.8 and 6.1.1.4)
;
  'Pt' 'Pt'  -1.703 8.390 
;
International Tables for Crystallography
(1992, Vol. C, Tables 4.2.6.8 and 6.1.1.4)
;

#==============================================================================

# ATOMIC COORDINATES AND THERMAL PARAMETERS

loop_
_atom_site_label
_atom_site_type_symbol
_atom_site_fract_x
_atom_site_fract_y
_atom_site_fract_z
_atom_site_U_iso_or_equiv
_atom_site_adp_type
_atom_site_occupancy
_atom_site_symmetry_multiplicity
_atom_site_calc_flag
_atom_site_refinement_flags
_atom_site_disorder_assembly
_atom_site_disorder_group
 Pt(1) Pt 0.76814(2) 0.10634(2) 0.26848(2) 0.01887(6) Uani 1.00 1 d . . .
 P(1) P 0.67685(14) -0.07789(12) 0.31183(10) 0.0166(3) Uani 1.00 1 d . . .
 P(2) P 0.59064(13) 0.17387(12) 0.32726(11) 0.0174(3) Uani 1.00 1 d . . .
 O(1) O 1.2842(4) -0.0524(4) 0.1367(3) 0.0303(12) Uani 1.00 1 d . . .
 O(2) O 0.9410(5) 0.5969(5) 0.0872(4) 0.0463(16) Uani 1.00 1 d . . .
 C(1) C 0.9377(5) 0.0505(5) 0.2218(4) 0.0193(13) Uani 1.00 1 d . . .
 C(2) C 0.9819(6) 0.0818(5) 0.1360(4) 0.0254(15) Uani 1.00 1 d . . .
 C(3) C 1.0974(5) 0.0495(5) 0.1036(4) 0.0219(14) Uani 1.00 1 d . . .
 C(4) C 1.1696(5) -0.0160(5) 0.1610(4) 0.0233(14) Uani 1.00 1 d . . .
 C(5) C 1.1272(6) -0.0489(5) 0.2484(4) 0.0232(14) Uani 1.00 1 d . . .
 C(6) C 1.0125(6) -0.0147(5) 0.2777(4) 0.0243(15) Uani 1.00 1 d . . .
 C(7) C 1.3420(7) -0.0044(7) 0.0535(5) 0.038(2) Uani 1.00 1 d . . .
 C(8) C 0.8305(6) 0.2709(5) 0.2138(4) 0.0243(15) Uani 1.00 1 d . . .
 C(9) C 0.9140(7) 0.3524(9) 0.2623(5) 0.046(2) Uani 1.00 1 d . . .
 C(10) C 0.9577(7) 0.4709(6) 0.2219(6) 0.042(2) Uani 1.00 1 d . . .
 C(11) C 0.9071(6) 0.4928(6) 0.1342(5) 0.0317(17) Uani 1.00 1 d . . .
 C(12) C 0.8194(8) 0.4081(7) 0.0843(5) 0.043(2) Uani 1.00 1 d . . .
 C(13) C 0.7825(8) 0.2959(6) 0.1240(5) 0.039(2) Uani 1.00 1 d . . .
 C(14) C 1.0268(9) 0.6875(7) 0.1361(8) 0.062(3) Uani 1.00 1 d . . .
 C(15) C 0.5353(5) -0.0580(5) 0.3812(4) 0.0216(14) Uani 1.00 1 d . . .
 C(16) C 0.4691(5) 0.0432(5) 0.3451(4) 0.0214(14) Uani 1.00 1 d . . .
 C(17) C 0.7555(5) -0.1769(5) 0.3875(4) 0.0181(13) Uani 1.00 1 d . . .
 C(18) C 0.8142(5) -0.1320(5) 0.4736(4) 0.0230(14) Uani 1.00 1 d . . .
 C(19) C 0.8618(7) -0.2086(6) 0.5368(4) 0.0293(16) Uani 1.00 1 d . . .
 C(20) C 0.8548(7) -0.3279(6) 0.5117(5) 0.0355(19) Uani 1.00 1 d . . .
 C(21) C 0.7989(6) -0.3733(5) 0.4260(5) 0.0323(17) Uani 1.00 1 d . . .
 C(22) C 0.7489(6) -0.2986(5) 0.3615(4) 0.0247(15) Uani 1.00 1 d . . .
 C(23) C 0.6128(5) -0.1714(5) 0.2066(4) 0.0191(13) Uani 1.00 1 d . . .
 C(24) C 0.4814(6) -0.2080(5) 0.1865(4) 0.0226(14) Uani 1.00 1 d . . .
 C(25) C 0.4398(6) -0.2705(5) 0.0998(4) 0.0269(15) Uani 1.00 1 d . . .
 C(26) C 0.5278(8) -0.3022(6) 0.0395(4) 0.0338(18) Uani 1.00 1 d . . .
 C(27) C 0.6603(7) -0.2682(6) 0.0619(5) 0.0338(18) Uani 1.00 1 d . . .
 C(28) C 0.7027(6) -0.2006(5) 0.1437(4) 0.0273(15) Uani 1.00 1 d . . .
 C(29) C 0.4969(5) 0.2767(4) 0.2678(4) 0.0182(13) Uani 1.00 1 d . . .
 C(30) C 0.5605(6) 0.3868(5) 0.2476(4) 0.0248(15) Uani 1.00 1 d . . .
 C(31) C 0.4903(6) 0.4673(5) 0.2032(4) 0.0256(15) Uani 1.00 1 d . . .
 C(32) C 0.3577(7) 0.4377(6) 0.1809(4) 0.0292(16) Uani 1.00 1 d . . .
 C(33) C 0.2948(6) 0.3287(6) 0.2054(4) 0.0280(16) Uani 1.00 1 d . . .
 C(34) C 0.3620(6) 0.2473(5) 0.2475(4) 0.0274(16) Uani 1.00 1 d . . .
 C(35) C 0.6319(5) 0.2514(5) 0.4422(4) 0.0219(14) Uani 1.00 1 d . . .
 C(36) C 0.7545(6) 0.2446(5) 0.4893(4) 0.0276(16) Uani 1.00 1 d . . .
 C(37) C 0.7911(6) 0.3026(6) 0.5757(4) 0.0317(17) Uani 1.00 1 d . . .
 C(38) C 0.7067(6) 0.3731(5) 0.6163(4) 0.0296(16) Uani 1.00 1 d . . .
 C(39) C 0.5880(6) 0.3804(5) 0.5719(4) 0.0256(15) Uani 1.00 1 d . . .
 C(40) C 0.5494(6) 0.3192(5) 0.4859(4) 0.0226(14) Uani 1.00 1 d . . .
 H(1) H 0.9335 0.1285 0.0980 0.031 Uiso 1.00 1 c R . .
 H(2) H 1.1252 0.0709 0.0433 0.027 Uiso 1.00 1 c R . .
 H(3) H 1.1763 -0.0938 0.2876 0.028 Uiso 1.00 1 c R . .
 H(4) H 0.9846 -0.0356 0.3381 0.029 Uiso 1.00 1 c R . .
 H(5) H 1.3093 -0.0534 -0.0010 0.048 Uiso 1.00 1 c R . .
 H(6) H 1.4341 -0.0004 0.0610 0.048 Uiso 1.00 1 c R . .
 H(7) H 1.3213 0.0734 0.0466 0.048 Uiso 1.00 1 c R . .
 H(8) H 0.9474 0.3357 0.3230 0.057 Uiso 1.00 1 c R . .
 H(9) H 1.0176 0.5315 0.2559 0.049 Uiso 1.00 1 c R . .
 H(10) H 0.7835 0.4254 0.0245 0.051 Uiso 1.00 1 c R . .
 H(11) H 0.7234 0.2358 0.0888 0.047 Uiso 1.00 1 c R . .
 H(12) H 0.9783 0.7369 0.1706 0.073 Uiso 1.00 1 c R . .
 H(13) H 1.0777 0.7339 0.0934 0.073 Uiso 1.00 1 c R . .
 H(14) H 1.0828 0.6532 0.1784 0.073 Uiso 1.00 1 c R . .
 H(15) H 0.4747 -0.1300 0.3758 0.026 Uiso 1.00 1 c R . .
 H(16) H 0.5648 -0.0407 0.4454 0.026 Uiso 1.00 1 c R . .
 H(17) H 0.4119 0.0642 0.3906 0.026 Uiso 1.00 1 c R . .
 H(18) H 0.4205 0.0182 0.2873 0.026 Uiso 1.00 1 c R . .
 H(19) H 0.8219 -0.0492 0.4898 0.027 Uiso 1.00 1 c R . .
 H(20) H 0.9002 -0.1772 0.5966 0.035 Uiso 1.00 1 c R . .
 H(21) H 0.8880 -0.3788 0.5552 0.043 Uiso 1.00 1 c R . .
 H(22) H 0.7945 -0.4556 0.4093 0.038 Uiso 1.00 1 c R . .
 H(23) H 0.7113 -0.3292 0.3013 0.030 Uiso 1.00 1 c R . .
 H(24) H 0.4200 -0.1923 0.2306 0.028 Uiso 1.00 1 c R . .
 H(25) H 0.3488 -0.2915 0.0840 0.032 Uiso 1.00 1 c R . .
 H(26) H 0.4976 -0.3457 -0.0180 0.040 Uiso 1.00 1 c R . .
 H(27) H 0.7218 -0.2921 0.0210 0.041 Uiso 1.00 1 c R . .
 H(28) H 0.7934 -0.1745 0.1573 0.032 Uiso 1.00 1 c R . .
 H(29) H 0.6515 0.4082 0.2633 0.029 Uiso 1.00 1 c R . .
 H(30) H 0.5344 0.5429 0.1876 0.031 Uiso 1.00 1 c R . .
 H(31) H 0.3107 0.4922 0.1503 0.036 Uiso 1.00 1 c R . .
 H(32) H 0.2032 0.3088 0.1920 0.034 Uiso 1.00 1 c R . .
 H(33) H 0.3171 0.1720 0.2629 0.033 Uiso 1.00 1 c R . .
 H(34) H 0.8115 0.1974 0.4612 0.033 Uiso 1.00 1 c R . .
 H(35) H 0.8731 0.2963 0.6065 0.037 Uiso 1.00 1 c R . .
 H(36) H 0.7322 0.4144 0.6754 0.034 Uiso 1.00 1 c R . .
 H(37) H 0.5315 0.4284 0.5995 0.031 Uiso 1.00 1 c R . .
 H(38) H 0.4661 0.3231 0.4562 0.028 Uiso 1.00 1 c R . .

loop_
_atom_site_aniso_label
_atom_site_aniso_U_11
_atom_site_aniso_U_22
_atom_site_aniso_U_33
_atom_site_aniso_U_12
_atom_site_aniso_U_13
_atom_site_aniso_U_23
 Pt(1) 0.01712(13) 0.01638(13) 0.02340(13) 0.00294(9) 0.00494(9) -0.00175(9)
 P(1) 0.0185(6) 0.0164(6) 0.0156(6) 0.0048(5) 0.0016(5) 0.0001(5)
 P(2) 0.0159(6) 0.0159(6) 0.0209(7) 0.0040(5) 0.0031(5) -0.0005(5)
 O(1) 0.024(2) 0.037(2) 0.036(2) 0.017(2) 0.0135(19) 0.015(2)
 O(2) 0.050(3) 0.036(2) 0.051(3) -0.004(2) 0.004(2) 0.008(2)
 C(1) 0.015(2) 0.013(2) 0.028(3) -0.002(2) 0.002(2) -0.002(2)
 C(2) 0.023(2) 0.025(3) 0.029(3) 0.006(2) 0.002(2) -0.003(2)
 C(3) 0.027(3) 0.026(3) 0.014(2) 0.009(2) 0.001(2) 0.008(2)
 C(4) 0.015(2) 0.029(3) 0.026(3) 0.004(2) 0.002(2) 0.001(2)
 C(5) 0.023(2) 0.021(2) 0.025(3) 0.001(2) 0.001(2) 0.008(2)
 C(6) 0.023(2) 0.022(2) 0.027(3) -0.000(2) 0.004(2) 0.002(2)
 C(7) 0.036(3) 0.038(4) 0.047(4) 0.018(3) 0.025(3) 0.022(3)
 C(8) 0.028(3) 0.019(2) 0.029(3) 0.010(2) 0.015(2) 0.004(2)
 C(9) 0.026(3) 0.090(6) 0.026(3) 0.029(4) -0.010(2) -0.015(3)
 C(10) 0.035(3) 0.025(3) 0.063(5) -0.001(3) -0.012(3) -0.009(3)
 C(11) 0.031(3) 0.025(3) 0.039(3) 0.003(2) 0.007(2) 0.007(2)
 C(12) 0.059(5) 0.043(4) 0.026(3) 0.001(3) -0.000(3) 0.009(3)
 C(13) 0.052(4) 0.026(3) 0.040(4) 0.002(3) 0.005(3) -0.002(3)
 C(14) 0.049(5) 0.027(4) 0.105(8) -0.005(3) 0.010(5) 0.006(4)
 C(15) 0.019(2) 0.025(3) 0.021(2) 0.003(2) 0.005(2) 0.002(2)
 C(16) 0.025(2) 0.019(2) 0.020(2) 0.003(2) 0.004(2) 0.002(2)
 C(17) 0.014(2) 0.020(2) 0.021(2) 0.002(2) 0.001(2) 0.004(2)
 C(18) 0.026(3) 0.025(3) 0.018(2) 0.003(2) -0.004(2) 0.002(2)
 C(19) 0.040(3) 0.031(3) 0.015(2) 0.006(2) -0.011(2) 0.003(2)
 C(20) 0.033(3) 0.033(3) 0.041(4) 0.008(3) -0.009(3) 0.008(3)
 C(21) 0.037(3) 0.019(3) 0.040(3) 0.007(2) -0.014(3) 0.004(2)
 C(22) 0.024(2) 0.024(3) 0.027(3) 0.005(2) 0.002(2) 0.007(2)
 C(23) 0.024(2) 0.015(2) 0.020(2) 0.010(2) 0.005(2) 0.001(2)
 C(24) 0.027(3) 0.025(3) 0.018(2) 0.010(2) -0.004(2) 0.002(2)
 C(25) 0.035(3) 0.017(2) 0.028(3) 0.005(2) -0.012(2) 0.003(2)
 C(26) 0.057(4) 0.024(3) 0.019(3) 0.003(3) -0.005(2) 0.002(2)
 C(27) 0.050(4) 0.023(3) 0.030(3) 0.006(3) 0.012(3) 0.003(2)
 C(28) 0.027(3) 0.027(3) 0.025(3) -0.004(2) 0.008(2) -0.002(2)
 C(29) 0.021(2) 0.011(2) 0.024(2) 0.005(2) 0.006(2) 0.003(2)
 C(30) 0.020(2) 0.026(3) 0.027(3) 0.002(2) -0.003(2) 0.001(2)
 C(31) 0.040(3) 0.021(2) 0.017(2) 0.006(2) -0.001(2) 0.006(2)
 C(32) 0.038(3) 0.030(3) 0.021(3) 0.012(2) -0.002(2) -0.003(2)
 C(33) 0.030(3) 0.028(3) 0.028(3) 0.012(2) -0.002(2) 0.006(2)
 C(34) 0.023(3) 0.023(3) 0.036(3) 0.002(2) 0.002(2) -0.000(2)
 C(35) 0.025(2) 0.016(2) 0.026(3) 0.004(2) 0.004(2) 0.006(2)
 C(36) 0.028(3) 0.029(3) 0.026(3) 0.006(2) 0.001(2) -0.002(2)
 C(37) 0.026(3) 0.038(3) 0.029(3) 0.005(2) -0.007(2) -0.004(2)
 C(38) 0.039(3) 0.025(3) 0.021(3) -0.005(2) 0.003(2) -0.006(2)
 C(39) 0.033(3) 0.016(2) 0.028(3) 0.006(2) 0.004(2) -0.006(2)
 C(40) 0.025(2) 0.024(3) 0.021(2) 0.009(2) 0.005(2) 0.005(2)

#==============================================================================

_computing_data_collection            'CrystalClear'
_computing_cell_refinement            'CrystalClear'
_computing_data_reduction             'CrystalStructure'
_computing_structure_solution         'SIR92'
_computing_structure_refinement       'CRYSTALS'
_computing_publication_material       'CrystalStructure 3.7.0'
_computing_molecular_graphics          ?

#==============================================================================

# MOLECULAR GEOMETRY

_geom_special_details
;
?
;

loop_
_geom_bond_atom_site_label_1
_geom_bond_atom_site_label_2
_geom_bond_distance
_geom_bond_publ_flag
_geom_bond_site_symmetry_1
_geom_bond_site_symmetry_2
Pt(1) P(1) 2.2858(14) yes . .
Pt(1) P(2) 2.2888(15) yes . .
Pt(1) C(1) 2.093(6) yes . .
Pt(1) C(8) 2.080(6) yes . .
P(1) C(15) 1.852(6) no . .
P(1) C(17) 1.838(6) no . .
P(1) C(23) 1.831(5) no . .
P(2) C(16) 1.831(5) no . .
P(2) C(29) 1.836(6) no . .
P(2) C(35) 1.822(6) no . .
O(1) C(4) 1.375(8) no . .
O(1) C(7) 1.446(9) no . .
O(2) C(11) 1.390(9) no . .
O(2) C(14) 1.388(10) no . .
C(1) C(2) 1.369(9) no . .
C(1) C(6) 1.394(9) no . .
C(2) C(3) 1.403(9) no . .
C(3) C(4) 1.392(9) no . .
C(4) C(5) 1.390(9) no . .
C(5) C(6) 1.388(9) no . .
C(8) C(9) 1.310(10) no . .
C(8) C(13) 1.402(10) no . .
C(9) C(10) 1.501(12) no . .
C(10) C(11) 1.374(11) no . .
C(11) C(12) 1.365(10) no . .
C(12) C(13) 1.423(11) no . .
C(15) C(16) 1.521(9) no . .
C(17) C(18) 1.379(7) no . .
C(17) C(22) 1.407(8) no . .
C(18) C(19) 1.399(9) no . .
C(19) C(20) 1.378(10) no . .
C(20) C(21) 1.366(10) no . .
C(21) C(22) 1.407(10) no . .
C(23) C(24) 1.375(8) no . .
C(23) C(28) 1.396(9) no . .
C(24) C(25) 1.408(8) no . .
C(25) C(26) 1.365(10) no . .
C(26) C(27) 1.386(11) no . .
C(27) C(28) 1.379(9) no . .
C(29) C(30) 1.371(8) no . .
C(29) C(34) 1.400(8) no . .
C(30) C(31) 1.404(9) no . .
C(31) C(32) 1.381(9) no . .
C(32) C(33) 1.377(9) no . .
C(33) C(34) 1.378(10) no . .
C(35) C(36) 1.420(9) no . .
C(35) C(40) 1.392(9) no . .
C(36) C(37) 1.377(9) no . .
C(37) C(38) 1.406(10) no . .
C(38) C(39) 1.369(9) no . .
C(39) C(40) 1.389(8) no . .
C(2) H(1) 0.950 no . .
C(3) H(2) 0.950 no . .
C(5) H(3) 0.950 no . .
C(6) H(4) 0.950 no . .
C(7) H(5) 0.950 no . .
C(7) H(6) 0.950 no . .
C(7) H(7) 0.950 no . .
C(9) H(8) 0.950 no . .
C(10) H(9) 0.950 no . .
C(12) H(10) 0.950 no . .
C(13) H(11) 0.950 no . .
C(14) H(12) 0.950 no . .
C(14) H(13) 0.950 no . .
C(14) H(14) 0.950 no . .
C(15) H(15) 0.950 no . .
C(15) H(16) 0.950 no . .
C(16) H(17) 0.950 no . .
C(16) H(18) 0.950 no . .
C(18) H(19) 0.950 no . .
C(19) H(20) 0.950 no . .
C(20) H(21) 0.950 no . .
C(21) H(22) 0.950 no . .
C(22) H(23) 0.950 no . .
C(24) H(24) 0.950 no . .
C(25) H(25) 0.950 no . .
C(26) H(26) 0.950 no . .
C(27) H(27) 0.950 no . .
C(28) H(28) 0.950 no . .
C(30) H(29) 0.950 no . .
C(31) H(30) 0.950 no . .
C(32) H(31) 0.950 no . .
C(33) H(32) 0.950 no . .
C(34) H(33) 0.950 no . .
C(36) H(34) 0.950 no . .
C(37) H(35) 0.950 no . .
C(38) H(36) 0.950 no . .
C(39) H(37) 0.950 no . .
C(40) H(38) 0.950 no . .

loop_
_geom_angle_atom_site_label_1
_geom_angle_atom_site_label_2
_geom_angle_atom_site_label_3
_geom_angle
_geom_angle_publ_flag
_geom_angle_site_symmetry_1
_geom_angle_site_symmetry_2
_geom_angle_site_symmetry_3
P(1) Pt(1) P(2) 86.34(5) yes . . .
P(1) Pt(1) C(1) 94.93(16) yes . . .
P(1) Pt(1) C(8) 171.91(17) yes . . .
P(2) Pt(1) C(1) 176.41(16) yes . . .
P(2) Pt(1) C(8) 91.25(19) yes . . .
C(1) Pt(1) C(8) 87.9(2) yes . . .
Pt(1) P(1) C(15) 107.5(2) no . . .
Pt(1) P(1) C(17) 126.47(17) no . . .
Pt(1) P(1) C(23) 109.61(19) no . . .
C(15) P(1) C(17) 100.1(2) no . . .
C(15) P(1) C(23) 106.9(2) no . . .
C(17) P(1) C(23) 104.7(2) no . . .
Pt(1) P(2) C(16) 107.4(2) no . . .
Pt(1) P(2) C(29) 124.4(2) no . . .
Pt(1) P(2) C(35) 111.4(2) no . . .
C(16) P(2) C(29) 104.3(2) no . . .
C(16) P(2) C(35) 106.8(2) no . . .
C(29) P(2) C(35) 101.3(2) no . . .
C(4) O(1) C(7) 117.3(5) no . . .
C(11) O(2) C(14) 116.6(6) no . . .
Pt(1) C(1) C(2) 120.5(4) no . . .
Pt(1) C(1) C(6) 121.8(4) no . . .
C(2) C(1) C(6) 117.6(5) no . . .
C(1) C(2) C(3) 122.2(6) no . . .
C(2) C(3) C(4) 118.8(5) no . . .
O(1) C(4) C(3) 123.9(5) no . . .
O(1) C(4) C(5) 115.8(5) no . . .
C(3) C(4) C(5) 120.3(5) no . . .
C(4) C(5) C(6) 119.0(6) no . . .
C(1) C(6) C(5) 122.2(6) no . . .
Pt(1) C(8) C(9) 121.0(5) no . . .
Pt(1) C(8) C(13) 119.8(4) no . . .
C(9) C(8) C(13) 119.2(6) no . . .
C(8) C(9) C(10) 120.3(7) no . . .
C(9) C(10) C(11) 118.9(6) no . . .
O(2) C(11) C(10) 125.1(6) no . . .
O(2) C(11) C(12) 114.2(6) no . . .
C(10) C(11) C(12) 120.6(6) no . . .
C(11) C(12) C(13) 118.9(7) no . . .
C(8) C(13) C(12) 122.1(6) no . . .
P(1) C(15) C(16) 110.8(4) no . . .
P(2) C(16) C(15) 110.5(4) no . . .
P(1) C(17) C(18) 118.9(4) no . . .
P(1) C(17) C(22) 121.0(4) no . . .
C(18) C(17) C(22) 120.0(5) no . . .
C(17) C(18) C(19) 119.9(5) no . . .
C(18) C(19) C(20) 120.1(5) no . . .
C(19) C(20) C(21) 120.5(7) no . . .
C(20) C(21) C(22) 120.5(6) no . . .
C(17) C(22) C(21) 118.8(5) no . . .
P(1) C(23) C(24) 122.5(4) no . . .
P(1) C(23) C(28) 117.4(4) no . . .
C(24) C(23) C(28) 120.1(5) no . . .
C(23) C(24) C(25) 118.7(6) no . . .
C(24) C(25) C(26) 121.2(6) no . . .
C(25) C(26) C(27) 119.6(6) no . . .
C(26) C(27) C(28) 120.1(7) no . . .
C(23) C(28) C(27) 120.2(6) no . . .
P(2) C(29) C(30) 118.6(4) no . . .
P(2) C(29) C(34) 121.4(4) no . . .
C(30) C(29) C(34) 119.9(5) no . . .
C(29) C(30) C(31) 119.5(5) no . . .
C(30) C(31) C(32) 120.9(5) no . . .
C(31) C(32) C(33) 118.7(6) no . . .
C(32) C(33) C(34) 121.5(6) no . . .
C(29) C(34) C(33) 119.5(5) no . . .
P(2) C(35) C(36) 119.0(4) no . . .
P(2) C(35) C(40) 123.0(4) no . . .
C(36) C(35) C(40) 118.0(5) no . . .
C(35) C(36) C(37) 121.3(6) no . . .
C(36) C(37) C(38) 119.0(6) no . . .
C(37) C(38) C(39) 120.3(5) no . . .
C(38) C(39) C(40) 120.7(6) no . . .
C(35) C(40) C(39) 120.6(5) no . . .
C(1) C(2) H(1) 118.6 no . . .
C(3) C(2) H(1) 119.2 no . . .
C(2) C(3) H(2) 120.7 no . . .
C(4) C(3) H(2) 120.6 no . . .
C(4) C(5) H(3) 120.4 no . . .
C(6) C(5) H(3) 120.7 no . . .
C(1) C(6) H(4) 118.9 no . . .
C(5) C(6) H(4) 119.0 no . . .
O(1) C(7) H(5) 110.7 no . . .
O(1) C(7) H(6) 109.0 no . . .
O(1) C(7) H(7) 108.7 no . . .
H(5) C(7) H(6) 109.5 no . . .
H(5) C(7) H(7) 109.5 no . . .
H(6) C(7) H(7) 109.5 no . . .
C(8) C(9) H(8) 119.5 no . . .
C(10) C(9) H(8) 120.2 no . . .
C(9) C(10) H(9) 121.8 no . . .
C(11) C(10) H(9) 119.3 no . . .
C(11) C(12) H(10) 119.6 no . . .
C(13) C(12) H(10) 121.5 no . . .
C(8) C(13) H(11) 118.6 no . . .
C(12) C(13) H(11) 119.3 no . . .
O(2) C(14) H(12) 109.1 no . . .
O(2) C(14) H(13) 110.3 no . . .
O(2) C(14) H(14) 109.0 no . . .
H(12) C(14) H(13) 109.5 no . . .
H(12) C(14) H(14) 109.5 no . . .
H(13) C(14) H(14) 109.5 no . . .
P(1) C(15) H(15) 108.7 no . . .
P(1) C(15) H(16) 108.9 no . . .
C(16) C(15) H(15) 109.4 no . . .
C(16) C(15) H(16) 109.5 no . . .
H(15) C(15) H(16) 109.5 no . . .
P(2) C(16) H(17) 108.8 no . . .
P(2) C(16) H(18) 109.6 no . . .
C(15) C(16) H(17) 108.7 no . . .
C(15) C(16) H(18) 109.7 no . . .
H(17) C(16) H(18) 109.5 no . . .
C(17) C(18) H(19) 119.8 no . . .
C(19) C(18) H(19) 120.3 no . . .
C(18) C(19) H(20) 119.3 no . . .
C(20) C(19) H(20) 120.5 no . . .
C(19) C(20) H(21) 119.3 no . . .
C(21) C(20) H(21) 120.2 no . . .
C(20) C(21) H(22) 120.0 no . . .
C(22) C(21) H(22) 119.5 no . . .
C(17) C(22) H(23) 120.2 no . . .
C(21) C(22) H(23) 121.0 no . . .
C(23) C(24) H(24) 120.5 no . . .
C(25) C(24) H(24) 120.8 no . . .
C(24) C(25) H(25) 118.9 no . . .
C(26) C(25) H(25) 119.9 no . . .
C(25) C(26) H(26) 119.8 no . . .
C(27) C(26) H(26) 120.7 no . . .
C(26) C(27) H(27) 119.8 no . . .
C(28) C(27) H(27) 120.1 no . . .
C(23) C(28) H(28) 120.0 no . . .
C(27) C(28) H(28) 119.8 no . . .
C(29) C(30) H(29) 120.3 no . . .
C(31) C(30) H(29) 120.3 no . . .
C(30) C(31) H(30) 119.7 no . . .
C(32) C(31) H(30) 119.4 no . . .
C(31) C(32) H(31) 120.5 no . . .
C(33) C(32) H(31) 120.8 no . . .
C(32) C(33) H(32) 119.1 no . . .
C(34) C(33) H(32) 119.4 no . . .
C(29) C(34) H(33) 120.2 no . . .
C(33) C(34) H(33) 120.3 no . . .
C(35) C(36) H(34) 119.2 no . . .
C(37) C(36) H(34) 119.5 no . . .
C(36) C(37) H(35) 120.1 no . . .
C(38) C(37) H(35) 120.9 no . . .
C(37) C(38) H(36) 119.3 no . . .
C(39) C(38) H(36) 120.3 no . . .
C(38) C(39) H(37) 120.0 no . . .
C(40) C(39) H(37) 119.4 no . . .
C(35) C(40) H(38) 119.1 no . . .
C(39) C(40) H(38) 120.3 no . . .


#End of CIF
